# 1 **Thresholding of cryo-EM density maps by false discovery rate control**

2

3 Maximilian Beckers<sup>1,2</sup>, Arjen J. Jakobi<sup>1,3,4,5</sup> and Carsten Sachse<sup>1\*</sup>

4

5 <sup>1</sup> European Molecular Biology Laboratory (EMBL), Structural and Computational  
6 Biology Unit, Meyerhofstraße 1, 69117 Heidelberg, Germany

7 <sup>2</sup> Candidate for Joint PhD degree from EMBL and Heidelberg University, Faculty of  
8 Biosciences

9 <sup>3</sup> European Molecular Biology Laboratory (EMBL), Hamburg Unit c/o DESY,  
10 Notkestraße 85, 22607 Hamburg, Germany

11 <sup>4</sup> The Hamburg Centre for Ultrafast Imaging (CUI), Luruper Chaussee 149, 22761  
12 Hamburg, Germany

13 <sup>5</sup> current address: Kavli Institute of Nanoscience, Department of Bionanoscience, Delft  
14 University of Technology, Van der Maasweg 9, 2629 HZ Delft, Netherlands

15

16 \* Correspondence should be addressed to: [carsten.sachse@embl.de](mailto:carsten.sachse@embl.de)

17

## 18 **Keywords**

19 Electron cryo-microscopy, signal detection, false discovery rate, cryo-EM density,  
20 subtomogram averaging, local resolution, ligand binding

21

22 **Abstract**

23 Cryo-EM now commonly generates close-to-atomic resolution as well as intermediate  
24 resolution maps from macromolecules observed in isolation and in situ. Interpreting  
25 these maps remains a challenging task due to poor signal in the highest resolution  
26 shells and the necessity to select a threshold for density analysis. In order to facilitate  
27 this process, we developed a statistical framework for the generation of confidence  
28 maps by multiple hypothesis testing and false discovery rate (FDR) control. In this  
29 way, 3D confidence maps contain separated signal from background noise in the form  
30 of local detection rates of EM density values. We demonstrate that confidence maps  
31 and FDR-based thresholding can be used for the interpretation of near-atomic  
32 resolution single-particle structures as well as lower resolution maps determined by  
33 subtomogram averaging. Confidence maps represent a conservative way of  
34 interpreting molecular structures due to minimized noise. At the same time they  
35 provide a detection error with respect to background noise, which is associated with  
36 the density and particularly beneficial for the interpretation of weaker cryo-EM  
37 densities in cases of conformational flexibility and lower occupancy of bound  
38 molecules and ions to the structure.

## 39 1. Introduction

40 Cryo-EM based structure determination has undergone remarkable technological  
41 advances over the last several years leading to a sudden multiplication of near-atomic  
42 resolution structures (Patwardhan, 2017). Before these transformative changes, only  
43 highly regular specimens such as helical or icosahedral viruses were resolved at such  
44 detail (Unwin, 2005; Sachse *et al.*, 2007; Zhang *et al.*, 2008; Yonekura *et al.*, 2003;  
45 Yu *et al.*, 2008; Ge & Zhou, 2011). With the advent of direct electron detectors  
46 (McMullan *et al.*, 2016) and simultaneous improvements in image processing software  
47 (Scheres, 2012*b*; Lyumkis *et al.*, 2013; Punjani *et al.*, 2017), smaller, less regular and  
48 more heterogeneous single-particle specimens became amenable to be routinely  
49 imaged below 4 Å resolution (Bai *et al.*, 2013; Li *et al.*, 2013; Liao *et al.*, 2013).  
50 Recently, the highest resolution structures have become available at ~2 Å resolution  
51 (Merk *et al.*, 2016; Bartesaghi *et al.*, 2018; 2015) and sub-4 Å structures below 100  
52 kDa from images obtained with and without an optical phase plate have been resolved  
53 (Merk *et al.*, 2016; Khoshouei *et al.*, 2017). These studies established the technical  
54 routines for determining atomic models of structures that were previously thought to  
55 be impossible to be resolved by cryo-EM or any other technique (Bai *et al.*, 2015; Galej  
56 *et al.*, 2016; Fitzpatrick *et al.*, 2017; Gremer *et al.*, 2017). Electron tomography is the  
57 visualization technique of choice for more complex samples including the cellular  
58 environment. Due to the poor signal-to-noise ratio (SNR) individual tomograms suffer  
59 from substantial noise artifacts. In case tomograms contain identical molecular units  
60 they can be averaged by orientationally aligning particle volumes (Briggs, 2013).  
61 Recently, with the increase of data quality and improved image processing routines,  
62 this approach also yielded near-atomic resolution maps from HIV capsid (Schur *et al.*,  
63 2016).

64

65 The resulting reconstructions regardless of whether they originate from single-particle  
66 and subtomogram averaging are inherently limited in resolution and suffer from  
67 contrast loss at high resolution (Rosenthal & Henderson, 2003). In the raw  
68 reconstructions, the high-resolution features are barely visible as the amplitudes follow  
69 an exponential decay described by the B-factor quantity that combines effects of  
70 radiation damage, imperfect detectors, computational inaccuracies and molecular

71 flexibility. The Fourier shell correlation (FSC) is the accepted procedure to estimate  
72 resolution (Saxton & Baumeister, 1982; van Heel *et al.*, 1982; Rosenthal & Henderson,  
73 2003) and can be compared with a given spectral signal-to-noise ratio (SSNR)  
74 (Penczek, 2002). Consequently, B-factor compensation by sharpening is essential  
75 and common practice. Sharpening is combined with signal-to-noise weighting to limit  
76 the enhancement of noise features (Rosenthal & Henderson, 2003). Based on  
77 sharpened maps, atomic models are built and further improved by real-space or  
78 Fourier-space coordinate refinement (Adams *et al.*, 2010; Murshudov, 2016). This  
79 process is particularly challenging at resolutions between 3 and 5 Å commonly  
80 achieved in cryo-EM. Recently, we proposed a method to sharpen maps by using local  
81 radial amplitude profiles computed from refined atomic models (Jakobi *et al.*, 2017).  
82 This method facilitates interpretation of densities with resolution variation, but also  
83 requires the prior knowledge of a starting atomic model with correctly refined atomic  
84 B-factors. Despite this advance, a more general approach is needed at the initial  
85 stages of density interpretation in particular in the absence of prior model information.  
86 Tracing of amino acids derived from the primary structure as well as placing non-  
87 protein components into density maps remains a laborious and time-consuming task.  
88 In particular, the EM density contains a large dynamic range of gray values for which  
89 only a small percentage of voxels is relevant for the interpretation using isosurface-  
90 rendered thresholded representations. In practice, the process of choosing a threshold  
91 is helped by the empirical recognition of binary density features matching those of  
92 expected protein features at the given resolution. Therefore, it would be desirable to  
93 have more robust density thresholding methods at hand to reduce subjectivity and  
94 provide statistical guidance in deciding which map features are considered significant  
95 with respect to background noise.

96

97 Extracting significant information from noisy data is a common problem in many fields  
98 of science. The simplest approach is based on thresholding corresponding to multiples  
99 of a standard deviation  $\sigma$  from an expected mean value. The experimental values are  
100 only considered significant when above and rejected as noise when below this  
101 threshold. In X-ray crystallography and cryo-EM, this  $\sigma$ -approach is commonly applied  
102 to the determined maps and  $\sigma$ -thresholds are often reported when isosurface

103 renderings of the density are displayed. In EM maps in particular, the  $\sigma$ -levels reported  
104 for interpretation are not universal and will be chosen by the interpreter as they vary  
105 from structure to structure between 1 and 5 multiples of  $\sigma$  and often to a smaller extent  
106 within the structure. The reason for the observed variation is that the high-resolution  
107 amplitudes of density peaks are very weak and can be compromised by noise after  
108 sharpening. In statistical theory, it has been recognized that the simple  $\sigma$ -method  
109 tends to increase the probability of declaring significance erroneously with larger  
110 number of tests (Miller *et al.*, 2001), which is referred to as the multiple testing problem.  
111 To account for this effect, the probability of correct detection could be increased by  
112 controlling the false discovery rate (FDR) (Benjamini & Hochberg, 1995). This  
113 statistical procedure has been applied to noisy images in astronomy (Miller *et al.*,  
114 2001) and to time recordings of brain magnetic resonance images (Genovese *et al.*,  
115 2002) to better discriminate signal from noise.

116

117 Due to the low SNRs of cryo-EM maps at high resolution, separating signal from noise  
118 remains a daunting task. At present, the visualization and interpretation of the density  
119 requires experience of the operator and thus relies on subjectively chosen isosurface  
120 thresholds. As sharpening procedures also amplify noise alongside the high-resolution  
121 signal, a more robust assessment of the statistical significance of those features by a  
122 particular detection error is desirable. Here, we propose to apply the statistical  
123 framework of multiple hypothesis testing by controlling the FDR to cryo-EM maps. The  
124 resulting maps we refer to as confidence maps represent the FDR of a per-voxel basis  
125 and allow the separation of signal from noise background. Confidence maps provide  
126 complimentary information to EM densities from single-particle reconstructions and  
127 subtomogram averaging as they allow detection of particularly weak features based  
128 on statistical significance measures.

129

## 130 **2. Methods**

### 131 **2.1. Statistical framework**

132 In order to overcome limitations in interpreting density features with respect to  
133 significance, we apply multiple hypothesis testing using FDR control to cryo-EM maps.  
134 In this workflow, we estimate the noise distribution from the background of a

135 sharpened cryo-EM map, apply subsequent statistical hypothesis testing for each  
136 voxel and control the FDR (**Fig. 1a**). For the background noise, we assume a Gaussian  
137 distribution or if required an empirical density distribution where the mean and variance  
138 of the noise is estimated from four independent density cubes outside the particle  
139 density along the central  $x$ ,  $y$  and  $z$  axes (**Fig. 1b**). Subsequently, these estimates are  
140 used to obtain upper bounds to assess signal from the particle with respect to  
141 background noise (see Appendix). In addition, we assume that cryo-EM density to be  
142 interpreted is of positive signal (see Results). Therefore, statistical hypothesis tests  
143 are carried out by one-sided testing. To account for the total number of voxels and the  
144 dependency between voxels,  $p$ -values are further corrected by means of a FDR  
145 control procedure according to Benjamini and Yekutieli (Benjamini & Yekutieli, 2001).  
146 The FDR-adjusted  $p$ -values (or  $q$ -values) of each voxel are directly interpretable as  
147 the maximum fraction of voxels that have been mistakenly assigned to signal over the  
148 background.

149  
150 As  $q$ -values of the respective voxels provide a well-established detection measure, we  
151 further explored its use for density presentation and thresholding. Based on the FDR,  
152 we inverted the map values to the positive predictive value (PPV) by  $PPV = 1 - FDR$ .  
153 When the map is thresholded at PPV of 0.99, at least 99% of the binarized voxels are  
154 truly positive density signal within the map, corresponding to a FDR of 1%. We term  
155 these maps confidence maps, referring to the fact that PPVs serve as a measure of  
156 the confidence by which we can discriminate signal from the noise. These confidence  
157 maps can then be visualized like usual cryo-EM maps with common visualization  
158 software, with the difference that the threshold for visualization is now given by  $1 - FDR$   
159 rather than the density potential.

160

## 161 **2.2. Simulations**

162 The simulated images were 400x400 pixels in size. The scaled grid was generated by  
163 adding two orthogonal two-dimensional cosine waves with a period of 5 pixels, where  
164 all values smaller than zero were set to 0, and multiplying the sum by a factor of 0.5  
165 in order to scale the maximum to 1. The scaled grid was 200x200 in size and  
166 embedded in the center of the 400x400 image. Gaussian distributed noise with a mean

167 of 0 and given variance of 0.01 (**Fig. 1c**), 0.1 (**Fig. S1a**) or 1.33 (**Fig. S1b**),  
168 respectively, was added to the grid image. Mean and variance for the multiple testing  
169 procedure were estimated outside the scaled grid and the FDR-procedure was carried  
170 out as described. Simulations were implemented in MATLAB (Mathworks Inc.).

### 171 **2.3. Software**

172 The algorithm is implemented in Python, based on NumPy (Walt *et al.*, 2011) and the  
173 mrcfile I/O library (Burnley *et al.*, 2017). Local resolutions were calculated using  
174 ResMap (Kucukelbir *et al.*, 2014). The software is available at  
175 <https://git.embl.de/mbeckers/FDRthresholding>. Figures were prepared with UCSF  
176 Chimera (Pettersen *et al.*, 2004).

177

## 178 **3. Results**

### 179 **3.1. FDR-based hypothesis testing yields improved signal detection in** 180 **simulations**

181 In order to evaluate the principal performance of the proposed method on simulated  
182 data, we prepared a two-dimensional grid of continuous density waves (**Fig. 1c, left**).  
183 We added white noise to a series of test images containing SNRs between 3.9 and  
184 0.3 as they occur in high-resolution shells of 3D reconstructions when the FSC curve  
185 drops from 0.67 up to 0.143 often reported as the resolution cutoff. First, we generated  
186 a test image with a SNR of 1.2 and noted that in the power spectrum computed from  
187 the simulated noise images, signal from high-resolution features cannot be detected  
188 although being present in the noise-free power spectrum (**Fig. 1c, right**). The  
189 detection of these high-resolution features, however, can be recovered from the  
190 corresponding confidence images that we generated as described above, even at  
191 SNRs ranging between 3.9 and 0.3 (**Fig. S1a-b**). When comparing images  
192 thresholded at conventional  $3.0\sigma$  levels with confidence images thresholded at a PPV  
193 of 0.99 or FDR of 0.01 (from here on referred to as 1% FDR), we note that FDR-  
194 controlled thresholding allows more faithful detection of weak density features closer  
195 to noise levels. In this way, the density transformation to confidence images minimizes  
196 false positive detection of pixels and improves the peak precision as adjacent noise  
197 peaks are suppressed (**Fig. S2**).

198



### 199 3.2. Choice of positive density model with Gaussian background noise

200 Although the model of Gaussian noise is often used to approximate background noise  
201 in cryo-EM images and maps (Sigworth, 1998; Scheres, 2012a; Kucukelbir *et al.*,  
202 2014; Vilas *et al.*, 2018), it is important to analyze actual maps to better understand  
203 deviations from this assumption. For this purpose, we analyzed a total of 32 deposited  
204 cryo-EM densities from 2 to 8 Å resolution and compared the empirical cumulative  
205 density function (CDF) with the ideal Gaussian CDF (**Fig. S3a**). It is apparent that all  
206 of them follow the ideal Gaussian CDF closely. For each map, we assessed normality  
207 by Anderson-Darling hypothesis testing (Anderson & Darling, 1954) and found that  
208 75% and 87.5 % of the maps do not significantly deviate from normality when  
209 conservative thresholds corresponding of 1% and 0.1% Family Wise Error Rates  
210 (FWER) are chosen (**Fig. S3b**). One of the reasons for the observed deviations from  
211 an idealized Gaussian distribution is a result of the 3D reconstruction procedure. In  
212 principle, when truly aligned images containing white Gaussian noise are combined  
213 by linear inversion, the obtained 3D volume will also have Gaussian distribution. In  
214 practice, in cases when uncertainties reside on the 5 orientation parameters,  
215 background noise is not necessarily Gaussian distributed. Moreover, resulting 3D  
216 reconstructions will contain local correlations, i.e. “colored noise”. Therefore, we  
217 analyzed the resulting noise of 3D reconstructions generated from pure noise images  
218 with even angular sampling. The resulting amplitude spectrum shows that it differs  
219 from pure white noise due to correlations between adjacent pixels (**Fig. S3c, left**).  
220 Furthermore, variances estimated for each voxel from 900 reconstructions show that  
221 they can be approximated uniform over the central sphere (**Fig. S3c, right**).

222

223 For the map of EMD-6287, which according to the Anderson-Darling test deviates  
224 strongly from normality, we generated a confidence map using the Gaussian and the  
225 empirical CDF. We inspected these confidence maps (**Fig. S3d**) and find that the  
226 visual agreement between the two maps is very high. To highlight potential  
227 differences, we computed a difference map between the two confidence maps created  
228 by the two approaches and observe no systematic variation when deviation from  
229 normality is assumed. Therefore, for interpreting confidence maps, small deviations  
230 from normality do not appear to have practical limitations. In order to rule out any



231 potential unforeseen effects when maps deviate more strongly, we routinely  
232 implemented the monitoring the degree of deviation from ideal Gaussian CDF. For  
233 instance when the deviation of the empirical CDF from the Gaussian CDF exceeds  
234 0.01, referring to the fact that  $p$ -values deviate by more than 1 %, can optionally use  
235 the empirical CDF for the generation of confidence maps.

236

237 The second assumption of the proposed confidence map assumes that protein gives  
238 rise to positive density in cryo-EM maps. When inspecting EM density maps, it is  
239 evident that not all signal present in the map is positive. Therefore, we analyzed  
240 whether significant negative densities can be detected in confidence maps generated  
241 from inverted densities. Indeed the confidence maps from negative densities reveal  
242 significant signal in regions between protein density often in a spatially complementary  
243 way (**Fig. S4a left**). Using the independently determined X-ray structure of the 20S  
244 proteasome (PDB code 1PMA), we tested whether negative density coincides with the  
245 atomic model. Overall, negative density has only a very small 2.5 % overlap with  
246 atoms, which is close to the predicted false discovery rate of 1 % (**Fig. S4b**). When  
247 using positive density, however, we find that a large fraction of 60 % of the PDB atoms  
248 are found in the 1 % FDR contoured confidence map and 10% of that volume is  
249 occupied by modelled atoms. In conclusion, we show that negative density presents  
250 significant signal in cryo-EM maps, however, that only a very small fraction is occupied  
251 by atoms. The largest fraction of negative densities are found next to positive protein  
252 density most likely due to the fact that the molecular density is lower than in the particle  
253 surrounding solvent area. Based on this analysis and our objective to identify those  
254 voxels that arise from protein density, we include the restraint of testing for positive  
255 signal into the generation of confidence maps and include an additional option to test  
256 for negative signal.

257

### 258 **3.3. Confidence maps from near-atomic resolution maps separate signal from** 259 **background suited for molecular structure interpretation**

260 In order to assess the potential of confidence maps for the interpretation of cryo-EM  
261 densities, we applied the algorithm to the near-atomic resolution map of TMV  
262 determined at a resolution of 3.35 Å (EMD 2842) (Fromm *et al.*, 2015). Variances

263 could be estimated reliably outside the helical rod from a range of different window  
264 sizes from 10 to 30 voxels using the cryo-EM density (**Fig. S5**). To generate the  
265 confidence map, we transformed the cryo-EM density to  $p$ -values and subsequently  
266 to confidence maps in an equivalent manner to the simulated confidence images  
267 above. Next, we inspected a longitudinal TMV section through the four helical bundle  
268 of the coat protein and compared the confidence map with the cryo-EM density (**Fig.**  
269 **2a and b**). The confidence map revealed backbone traces that contain values close  
270 to 1 corresponding to the helical pitch of the LR helix. They clearly stand out with  
271 respect to background noise that is suppressed towards values of 0. The associated  
272 histogram of the confidence map revealed a strong peak beyond 0.99 PPV or below  
273 1 % FDR separating signal over background and thresholding 5.7 % of voxels within  
274 the density. In the case of the deposited cryo-EM map, the subjectively fine-tuned and  
275 recommended  $1.2 \sigma$  threshold also yielded a recognizable outline of helical pitch  
276 contours while detecting only 3.7 % of voxels from the density. In analogy to  
277 isosurface-rendered cryo-EM densities, confidence map exhibit recognizable  
278 structural details, such as the  $\alpha$ -helical pitch and many side chains of the central  
279 helices (**Fig. 2c**). When applying a lower FDR of 0.01 %, polypeptide density becomes  
280 discontinuous and smaller density features disappear. When going to higher FDR  
281 thresholds such as 10 %, noise starts to be included in the density. At the  
282 recommended 1 % FDR threshold, the appearance of noise is minimal and well  
283 controlled in confidence maps. This is in contrast to cryo-EM densities, where the  
284 appearance of noise is very sensitive to small changes in threshold level in particular  
285 at lower  $\sigma$ . In fact, the recommended  $1.2 \sigma$  contour includes only 52 % of the atoms of  
286 the model whereas the 1 % FDR threshold contour already contains 73 % with  
287 minimized noise. In order to include the same amount of atoms in a contour, a  
288 threshold of  $0.7 \sigma$  would be required, which at the same time will lead to a noticeable  
289 increase of obstructing noise. Furthermore, we also examined two additional  
290 confidence maps from EMDB model challenge targets determined at near-atomic  
291 resolution: 20S proteasome (Campbell *et al.*, 2015) and  $\gamma$ -secretase (Bai *et al.*, 2015)  
292 (**Fig. S6a and S6b**). These confidence maps confirm the previous observation that  
293 when displayed at FDR levels of 1 %, they provide structural details at near-atomic  
294 resolution while effectively separating signal from noise.

295

296 **3.4. Confidence maps provide a map detection error with respect to**  
297 **background noise**

298 When confidence maps are generated from cryo-EM densities, the main aim of the  
299 approach is to determine a voxel-based confidence measure of molecular density  
300 signal with respect to background noise. In principle, the confidence measure could  
301 also be interpreted as a broader error estimate of the EM map referring to the rate of  
302 falsely discovered of voxels. The error, however, as it arises from a cryo-EM  
303 experiment is a comprehensive quantity, which results from multiple contributions in  
304 the form of the solvent scattering, detector noise as well as computational sources of  
305 alignment and reconstruction algorithms in addition to variation of signal by multiple  
306 molecular conformations and radiation damage effects (Frank & Liu, 1995; Penczek  
307 *et al.*, 2006). Estimating the complete series of error contributions including signal  
308 variation is currently not possible in the context of common cryo-EM collection  
309 schemes. Therefore, the most straightforward way of estimating noise is measuring  
310 the variance of the map solvent area. This variance mainly captures errors as they  
311 arise from detector noise and solvent scattering while neglecting contributions of  
312 computation and local molecular variations. Detector noise can be considered to be  
313 distributed uniformly over the 3D reconstruction whereas solvent scattering distribution  
314 will not be uniform as pure solvent noise next to the particle is higher when compared  
315 with solvent noise projected through the particle due to solvent displacement and  
316 variations of water thickness in the particle view (Penczek, 2010). Consequently,  
317 measuring noise in the solvent area of cryo-EM maps, will lead to an effective  
318 overestimation of noise and therefore to an underestimation of confidence (see  
319 Appendix Proposition 1). Although these deviations from a uniform Gaussian noise  
320 model do not allow absolute error determination, in practice estimating solvent  
321 variance can be used as conservative upper bounds for error rates without including  
322 errors arising from computation and molecular variation. In conclusion, the error as it  
323 arises from confidence maps should be considered a map detection error with respect  
324 to background noise that can assist in the interpretation of cryo-EM densities.

325

### 326 **3.5. Robustness of FDR-controlled density transformation**

327 In order to test the robustness of the approach, we systematically assessed the effects  
328 of the required input on the resulting confidence map. First, we tested the influence of  
329 severely underestimating noise for confidence map generation by using the 1/2 or 3/4  
330 of the determined variance of the 20S proteasome densities (**Fig. S6c**). The resulting  
331 confidence maps displayed at 1 % FDR revealed excessive declaration of background  
332 as signal, which poses a principal risk for over-interpretation. This principal risk,  
333 however, is less relevant, when the here proposed variance measurements outside  
334 the particle is used as we tend to overestimate noise (see above and Appendix  
335 Proposition 1). Therefore, we tested the effect of overestimating the variance by 1.25,  
336 2 and 8 fold and generated confidence maps according to the defined procedure. The  
337 resulting confidence maps show the disappearance of map features at the 1 % FDR  
338 threshold only when the variance is severely overestimated by a factor of 8 but for  
339 small overestimations is hardly noticeable in the map appearance. Another important  
340 noise-related parameter prior to the proposed procedure is the applied sharpening  
341 level. Therefore, we tested a series of B-factors from 0 to -250 Å<sup>2</sup> applied to the 20S  
342 proteasome maps and converted them into confidence maps. First, with increasing  
343 negative B-factors the corresponding confidence maps displayed at 1 % FDR show  
344 loss of features due to the drop in relative significance. This is in contrast to cryo-EM  
345 densities that become severely over-sharpened and density features are dominated  
346 by noise (**Fig. S6d**). Second, when under-sharpened maps are used for noise  
347 estimation, maps will contain only low-resolution features lacking high-resolution detail  
348 at the respective significance level in analogy to cryo-EM densities. Therefore, when  
349 over-sharpened maps are used for noise estimation, confidence maps inherently avoid  
350 enhancement of noise features that could be mistakenly interpreted as signal.  
351 Although noise estimation is important for the procedure, tests show that smaller  
352 variance overestimation does not have a noticeable effect on map interpretation of 1  
353 % FDR confidence maps. In conclusion, confidence maps represent a conservative  
354 way of displaying maps at defined significance while avoiding the problem of over-  
355 sharpening, which represents a principal benefit over visualization of  $\sigma$ -thresholded  
356 sharpened EM densities.

357

### 358 **3.6. Confidence maps facilitate detection of weak density features**

359 In order to evaluate further molecular details of the confidence map, we inspected  
360 more ambiguous density features of the TMV map. Peripheral density at lower and  
361 higher radius of the virus was notoriously difficult to interpret in previous works (Fromm  
362 *et al.*, 2015; Sachse *et al.*, 2007; Namba & Stubbs, 1986). For these regions, we found  
363 that there are well-defined features present in the 1% FDR confidence maps. Densities  
364 of the coat protein for loops Q97 – T103 located at the inner radius and T153 – G155  
365 at the outer radius are not present in the respective EM map, but clearly traceable in  
366 the 1% FDR confidence map (**Fig. 2d, center**). In addition, side-chain density for K53  
367 contacting the adjacent subunit was found to be clearly significant while being  
368 discontinuous in the original map (**Fig. 2d, bottom left**). Based on confidence maps,  
369 readjustment of side-chain rotamers was possible, illustrated for example by  
370 significant density for R61, which suggests a realignment of R61 to form stabilizing  
371 interactions with aromatic W152 (**Fig. 2d, bottom right**). The presented examples of  
372 TMV illustrate that confidence maps represent an alternative for density display, which  
373 can help in the process of molecular feature detection. Although threshold adjustments  
374 in cryo-EM maps can also help model interpretation in ambiguous regions and  
375 enhance weak density features, they also amplify noise features and increase the risk  
376 of noise fitting.

377

378 We also tested cases of more heterogeneous densities such as the V-ATPase SidK  
379 complex (EMD-8724), which was determined at 6.8 resolution (Zhao *et al.*, 2017).  
380 First, the deposited EM map contains very weak density of the bacterial effector SidK  
381 EM density due to low occupancy and flexible motion. The corresponding confidence  
382 map of the V-ATPase SidK complex reveals that the SidK density is not significant as  
383 continuous density when thresholded at 1% FDR as it is too noisy for further analysis  
384 (**Fig. S7a**). Below in section 3.8, we will deal with cases of local resolution and SNR  
385 variation that can be accommodated by a locally adjusted FDR procedure. Second,  
386 we analyzed confidence maps from three conformational states generated by 3D  
387 classification (EMD-8724, EMD-8725, EMD-8726). The generated confidence maps  
388 thresholded at 1 % FDR of state 1, 2 and 3 confirm previous observations using EM  
389 maps (**Fig. S7b**). Taken together, confidence maps provide an inherent significance

390 level associated with the density and minimize false positive noise detection. In this  
391 way, confidence maps can guide atomic model interpretation of cryo-EM density maps  
392 in particular in density regions of ambiguous quality.

393

### 394 **3.7. Confidence maps from subtomogram averages**

395 We further explored whether structures determined at lower resolution may also  
396 benefit from the approach. For this purpose, we examined the *in situ* determined sub-  
397 tomogram average of the HeLa nuclear pore complex computed from 8 pore particles  
398 at 90 Å resolution (Mahamid *et al.*, 2016). The deposited map clearly shows  
399 continuous densities for the cytoplasmatic and inner ring molecules whereas density  
400 below and above the pore is noisy when visualized at a threshold of 2.0  $\sigma$  (**Fig. 3a**).  
401 The corresponding the 1% FDR confidence map shows continuous features of the ring  
402 structure with minimized noise, which makes interpretation straightforward. In order to  
403 generate a confidence map for a subtomogram average structure, care must be taken  
404 in identifying areas of noise devoid of any signal in order to estimate the noise variance  
405 reliably (**Fig. S8a**). The same tomograms recorded from lamella of HeLa cells also  
406 yielded a subtomogram average of ER-associated ribosomes. The ribosome structure  
407 itself could be determined at 35 Å at the membrane with weak density below the  
408 membrane ascribed to a translocon-associated protein complex and an  
409 oligosaccharyltransferase (Mahamid *et al.*, 2016). The corresponding densities can  
410 only be visualized at low thresholds corresponding to 0.8  $\sigma$  while increasing the  
411 amount of background noise and hampering molecular interpretation (**Fig. 3b**). The 1  
412 % FDR confidence maps, however, display the additional protein complexes in the  
413 absence of noise. In this case, the confidence map discriminates between specific  
414 association of the TRAP complex and the looser association of ribosomes within the  
415 polysome assembly. Further, we examined deposited and confidence maps of the 23  
416 Å resolution nuclear pore structure determined by subtomogram averaging (Appen *et al.*, 2015) (**Fig. 3c**). While the overall densities look very similar, we focused our  
417 comparison on ambiguous density assignment of the linker region of Nup133.  
418 Presence of density in the 1% FDR confidence maps confirms the continuity of this  
419 density stretch and the author's interpretation of placing the Nup133 linker region  
420 connecting the N-terminal  $\beta$ -propeller and C-terminal  $\alpha$ -helical domain (**Fig. 3c, upper**  
421



422 **right**). In addition, we identified additional densities in the connecting densities  
423 between the inner and nuclear as well as the inner and the cytoplasmic ring (**Fig. 3c**,  
424 **bottom**). Both densities are not visible at the recommended  $\sigma$ -threshold of 2.1 but  
425 they are reliably displayed in the 1% FDR confidence map. Taken together, confidence  
426 maps generated from lower resolution subtomogram averages as well as from near-  
427 atomic resolution reconstructions assist in the density interpretation by separating  
428 signal with respect to background noise.

429

### 430 **3.8. Confidence maps benefit from local SNR adjustment in cases of** 431 **resolution variation**

432 After establishing the usefulness for maps covering a range of resolutions, we wanted  
433 to further explore how FDR-controlled confidence maps cope with large resolution  
434 differences within a single map. For this purpose, we analyzed the very high-resolution  
435 2.2 Å map of  $\beta$ -galactosidase ( $\beta$ -gal) (EMD2984) (Bartesaghi *et al.*, 2015) in more  
436 detail as it covers resolution ranges from 2.1 to 3.8 Å. In order to reveal high-resolution  
437 details in the center of the map, high sharpening levels were required and  
438 consequently less well resolved parts in the periphery of the map resulted in over-  
439 sharpened densities. When we applied our method to the cryo-EM density volume, we  
440 found the 1% FDR confidence to be well defined in the center of the map but fading  
441 out for large parts of the periphery in support of the B-factor test series on the 20S  
442 proteasome (**Fig. S8c**). We reasoned when resolution differs across the map as a  
443 consequence of molecular flexibility and computational errors, the SNR will vary in  
444 correspondence. To compensate for these effects, noise levels can be adjusted in  
445 cryo-EM maps by applying local low-pass filtrations in Fourier space according to local  
446 resolutions (Cardone *et al.*, 2013). Consequently, a local variance can be estimated  
447 for each voxel by applying the same low-pass filter to the background noise windows  
448 (**Fig. S9a**). Application of this procedure followed by the FDR control yield a more  
449 evenly distributed 1% FDR confidence map including the  $\beta$ -gal periphery (**Fig. 4a, b**  
450 **top**). At the same time, side chain details such as holes in aromatic rings can be  
451 resolved at the same significance level as exemplified for W585 in analogy to the  
452 appropriately filtered density (**Fig. 4a, b bottom**). Closer inspection of the cryo-EM  
453 density shows that we did not observe density for the peripheral loops of the  $\beta$ -gal



454 complex at the 4.5  $\sigma$ -threshold but clearly detected continuous loop density at a FDR  
455 of 1% of the resolution-compensated confidence map (**Fig. 4c, left and right**). These  
456 observations show that the statistical power of the procedure can be improved, i.e. the  
457 amount of missed signal can be reduced in cases non-uniform noise levels, while still  
458 controlling the FDR by incorporation of local resolution information (see Appendix for  
459 detailed discussion).

460

461 We recently introduced a local map sharpening tool for cryo-EM maps based on  
462 refined atomic B-factors (Jakobi *et al.*, 2017). When refined atomic coordinates are  
463 available, the concept of resolution-compensated confidence maps based on adjusted  
464 variances derived from local resolution filtering can be easily extended by scaling the  
465 radial amplitude falloff of the noise window against the local reference model for  
466 estimating the resulting local noise levels (**Fig. S9b**). In order to directly compare  
467 confidence maps generated by different filtering or scaling approaches, we focused  
468 on the inspection of the peripheral regions of the  $\beta$ -gal enzyme as the densities are  
469 weak in particular for loops extending from the particle. When we compared the  
470 confidence map of this region generated using the local resolution filtering with the  
471 original confidence map, we confirm the observation that adjustments according to  
472 local resolutions improve the density connectivity (**Fig. S10a, b**). When we used the  
473 local amplitude scaling approach, we obtained a confidence map with improved  
474 density coverage when compared with the original confidence map but less coverage  
475 when using local resolution filtering (**Fig. S10b, c**). In combination, when local variance  
476 is estimated based on local amplitude scaling and filtering, we find optimal coverage  
477 of density and the atomic model (**Fig. S10d**). Another example from the EMDB model  
478 challenge is the TRPV1 channel determined at 3.4 Å resolution (EMD5578) (Liao *et al.*,  
479 2013). The structure contains a well-defined transmembrane region and a more  
480 flexible cytoplasmic domain that is less well resolved. The application of locally  
481 adjusted SNRs to the confidence map yields a map with well interpretable density  
482 including molecular details (**Fig. 4d and 4e**). In analogy to the examples above, the  
483 cytoplasmic domain is only visible at lower thresholds than the core of the protein. The  
484 1 % FDR confidence map captures all density occupied by the protein including the  
485 more flexible regions at the cytoplasmic domain. The example of the TRPV1 channel

486 confirms the observation of  $\beta$ -gal that local resolution differences need to be taken into  
487 account for correct generation of confidence maps. When maps exhibit strong local  
488 variation of noise due to molecular flexibility and computational errors, local variances  
489 can be estimated based on local resolution measurements or on local sharpening  
490 procedures and yield well-interpretable confidence maps at a single FDR threshold.

491

### 492 **3.9. Confidence maps confirm detection of bound molecules**

493 The majority of near-atomic resolution maps obtained by cryo-EM are in the resolution  
494 range between 3 and 4.5 Å. Although main-chain and large side-chain density can  
495 often be modeled reliably, smaller side chains and ordered non-protein components  
496 such as water molecules and ions are inherently difficult to model at these resolutions  
497 and pose the risk of noise fitting. Therefore, we investigated whether confidence maps  
498 can help to mitigate this problem and inspected a putative  $Mg^{2+}$  site coordinated by  
499 E416, E461, H418 and three additional  $H_2O$  molecules inside of the  $\beta$ -gal enzyme.  
500 We rigidly placed of the  $Mg^{2+}$  ion and coordinated water molecules based on the 1.6  
501 Å resolution X-ray crystal structure (Wheatley *et al.*, 2015) (PDB 4ttg) and superposed  
502 them onto the deposited EM density map. The map at lower 3.5  $\sigma$  threshold shows  
503 convincing density for only two out three water molecules. (**Fig. 5a top left**). In  
504 contrast, the 1% FDR confidence map based on local variance estimation reveals  
505 distinct density peaks for all three suspected  $H_2O$  molecules (**Fig. 5a top right**).  
506 Furthermore,  $\beta$ -gal had been imaged in the presence of the small molecule inhibitor  
507 PETG. Locating and conformational modeling of the ligand remains challenging due  
508 to flexibility and lower occupancy (**Fig. 5a bottom left**). Ligand placement is facilitated  
509 using confidence maps, with density well resolved for the complete small molecule  
510 inhibitor (**Fig. 5a bottom right**). The confidence density confirms previous re-  
511 refinement of the inhibitor position and conformation (Jakobi *et al.*, 2017). In addition,  
512 we also tested whether detection of smaller ions can be facilitated by confidence  
513 maps. For this purpose, we turned again to the TRPV1 channel and inspected the  
514 density surrounding G643 known as the selectivity filter for the ions passing the  
515 channel. The deposited map reveals a density peak in the symmetry center that is  
516 compatible with a small ion. In support, the confidence map also shows a density peak  
517 at the same position supporting the presence of an ion with a confidence of 1 % FDR

518 (Fig. 5b bottom right). In correspondence, there are multiple cryo-EM structures  
519 reporting putative ion densities along an array of carbonyl forming an inner cavity of  
520 the channel (Lee & MacKinnon, 2017; McGoldrick *et al.*, 2018). Closer inspection of  
521 the  $\gamma$ -secretase complex reveals significant density for a membrane-embedded  
522 phosphatidylcholine (PC) lipid molecule. In order to detect the two PC acyl chains, the  
523 deposited EM map requires thresholding at two different  $\sigma$ -levels of 4 and 5  
524 presumably due to differences in chain mobility (Fig. 5c). In contrast, the  
525 corresponding 1% FDR confidence map encompasses most of the density of two acyl  
526 chains without the need of threshold adjustments. In conclusion, confidence maps  
527 from cryo-EM structures possess minimized noise and can be directly used to evaluate  
528 the significance of density features to be present by providing a map detection error  
529 that e.g. 1 % of the peaks are expected to be falsely discovered. Using complementary  
530 information for the interpretation of cryo-EM structures will help to reduce subjectivity  
531 involved in the process of density interpretation.

532

#### 533 4. Discussion

534 In the current manuscript, we introduced FDR-based statistical thresholding of cryo-  
535 EM densities as a complementary tool for map interpretation. This approach is used  
536 successfully in other fields of image processing sciences (Genovese *et al.*, 2002).  
537 Based on a total of five near-atomic resolution EM maps from the EMDB model  
538 challenge (<http://challenges.emdatabank.org>), one intermediate resolution (6.8 Å)  
539 structure and three subtomogram averages in the resolution range between 90 and  
540 23 Å, we showed that using 1% FDR confidence maps are well suited for detailed  
541 molecular feature detection and result in better confidence in particular for assignment  
542 of weak structural features. Although for all maps different  $\sigma$ -levels ranging between 1  
543 and 5 could be used for the interpretation of relevant cryo-EM map features,  
544 confidence maps thresholded at a common 1 % FDR level show consistent  
545 interpretability of molecular features for these maps. The advantage of confidence  
546 maps is that they effectively separate signal from a background noise estimate by  
547 assigning a confidence scale from 0 to 1 and at 1 % FDR. This way they show  
548 consistent inclusion of signal while minimizing noise. In contrast, for cryo-EM densities  
549 small changes of the isosurface  $\sigma$ -threshold can have severe consequences for the

550 interpretability of molecular features and bear the risk of mistakenly including noise.  
551 Therefore, confidence maps and associated FDR thresholds provide a common and  
552 conservative thresholding criterion for the interpretation of cryo-EM maps.

553

554 Included in the algorithm is a direct assessment of the signal significance with respect  
555 to background noise associated with particular density features visible in cryo-EM  
556 maps, which adds an additional objectivity to reporting of ambiguous density features.  
557 Based on these properties, high-resolution confidence maps will be helpful in initial  
558 atomic model building when no or little atomic reference structures are available and  
559 for assessment of critical details such as side chain conformations and non-protein  
560 molecules in the density. The use of these maps will improve the quality of initial  
561 atomic models before launching real-space or reciprocal atomic coordinate refinement  
562 (Murshudov, 2016; Adams *et al.*, 2010), which should proceed with sharpened or  
563 alternatively model-based sharpened maps as refinement targets (Jakobi *et al.*, 2017).  
564 The molecular interpretation based on confidence maps is not limited to maps of close-  
565 to-atomic resolution as we demonstrated its benefit for cases of intermediate  
566 resolution single-particle and subtomogram averaging with three maps ranging in  
567 resolution from 7 – 90 Å. In these cases, the interpretation of an unassigned density  
568 using a confidence level is a beneficial property in particular in the absence of atomic  
569 model information.

570

571 We also showed that the generation of confidence maps is a robust procedure. From  
572 the sharpened cryo-EM density, we compute the CDF from the solvent background,  
573 which in most cases can be approximated by a Gaussian distribution. In addition, we  
574 assume protein density to be positive as the overwhelming majority of determined  
575 atoms density resides in positive density. Moreover, we find that the region selected  
576 for noise estimation is critical as it has to contain pure noise devoid of signal. We found  
577 this particularly important for generating confidence maps from subtomogram  
578 averages with particle boundaries less well defined. Generally, when estimating  
579 background noise outside the particle, we tend to overestimate noise due to smaller  
580 ice thickness in particle regions. Smaller deviations from noise estimation show little  
581 effect on the conversion to confidence maps (**Fig. S6b**). We show that when

582 suboptimally sharpened input maps are used to generate confidence maps, the  
583 operator avoids the common risk of mistakenly interpreting noise as signal in over-  
584 sharpened cryo-EM densities. In contrast, confidence maps generated from over-  
585 sharpened input maps will only result in insufficient declaration of density signal, which  
586 is an important safety feature. Once noise is estimated, the procedure of generating  
587 confidence maps is statistically clearly defined (Benjamini & Hochberg, 1995;  
588 Benjamini & Yekutieli, 2001) and does not contain any free parameters to optimize.  
589 Only in cases of substantial resolution variation due to molecular flexibility and  
590 computational errors, it may be required to locally adjust SNRs by including prior  
591 information through local resolution filtering. More sophisticated approaches such as  
592 amplitude scaling can also be used in cases where atomic reference structures are  
593 available. Adjusting FDR control based on prior information is routinely implemented  
594 in other applications of statistical hypothesis testing (Chong *et al.*, 2015; Ploner *et al.*,  
595 2006). With the manuscript, we provide a program that requires a 3D volume as input  
596 and allows specification of the location of density windows used for noise estimation.  
597 The presented implementation including local resolution filtration is computationally  
598 fast, taking from 30 s to 2 min on a Xeon Intel CPU for the maps produced in this  
599 manuscript.

600

601 We presented several cases in our simulation and EMDB maps where confidence  
602 maps displayed weak structural features more clearly while minimizing the occurrence  
603 false positive pixels (**Figures 1–5**). This is a particularly useful property of confidence  
604 maps. Weak densities close to inherent noise levels are present in most cryo-EM maps  
605 and they result as a consequence of the molecular specimen as well as from the  
606 applied computational procedures. For example, they can originate from side chain  
607 mobility in the form of multiple rotamers or side-chain specific radiation damage  
608 (Fromm *et al.*, 2015; Allegretti *et al.*, 2014; Bartesaghi *et al.*, 2014). In addition, ligands  
609 including small organic compounds or larger protein complex components may have  
610 lower occupancy or partial flexibility {Zhao:2017hi}. In many complexes, peripheral  
611 loops exposed to the solvent tend to have larger molecular flexibility than the core of  
612 the protein (Hoffmann *et al.*, 2015). We showed that thresholding confidence maps  
613 yield higher voxel detection rates than thresholding in common cryo-EM densities. We

614 believe that is a result of the fact that the human operator prefers to recommend a  
615 more conservative  $\sigma$ -threshold to avoid excessive inclusion of noise while as a  
616 consequence one misses out on signal. Using confidence maps, this type of noise can  
617 be suppressed and as a result more reliable signal can be interpreted.

618

619 With the increasing number of near-atomic resolution cryo-EM structures, the process  
620 of building atomic models has become increasingly important but remains time-  
621 consuming and labor-intense. Confidence maps can assist the user throughout this  
622 process. In X-ray crystallography, multiple complementary maps are being used  
623 routinely in the process of model building. Real-space model building and optimization  
624 is typically performed using maximum likelihood-weighted  $2mF_o-DF_c$ , assisted by  
625  $mF_o-DF_c$  difference map used to highlight errors in the model. Various forms of omit  
626 maps computed from phases of models in which a selection of atoms (e.g. a ligand)  
627 has been omitted are used to confirm the presence of ligand and ambiguous density.  
628 Similarly, confidence maps display a complementary aspect of cryo-EM maps in  
629 helping to reduce ambiguity in density interpretation of e.g. weakly bound ligands,  
630 alternative side-chain rotamers, conformationally heterogeneous structures including  
631 incomplete or flexible parts of the complex. It is evident that confidence maps would  
632 not be suitable for model refinement, as they do not discriminate the scattering mass  
633 of different atoms or relative uncertainties of atomic positions. These properties are  
634 usually modelled by atomic electron form factors and atomic displacement factors  
635 (atomic B-factors). However, owing to the increased precision of density peaks and  
636 noise suppression, it is perceivable that confidence maps could be used to guide  
637 positional coordinate refinement if implemented as a peak searching procedure. In  
638 addition, defined confidence values for density stretches should also be useful and  
639 potentially beneficial for automated model building approaches. Interpreting cryo-EM  
640 densities by means of an atomic model is often the final step of a cryo-EM experiment.  
641 In practice, atomic models are even used as a validation tool to examine density  
642 features for side chains at expected positions. One of the key advantages of the here  
643 proposed confidence maps is that they can be generated without prior knowledge of  
644 an atomic model. As the conversion of cryo-EM densities to FDR controlled maps is a  
645 conceptually simple and computationally straightforward, confidence maps could be



646 routinely consulted for providing complementary information of statistical significance  
647 during the intricate process of interpreting ambiguous densities in cryo-EM structures  
648 resulting from molecular flexibility or partial occupancy.

649

## 650 **Author contributions**

651 M.B. and C.S. initiated the project. M.B. developed and implemented the code for the  
652 algorithm. A.J.J. helped with structure comparison and implementation including  
653 LocScale integration. C.S. supervised the project. M.B. and C.S. wrote the manuscript  
654 with input from A.J.J.

655

## 656 **Acknowledgements**

657 M.B. has been supported by the EMBL International PhD Programme. We thank  
658 Martin Beck (EMBL) for critical reading of the manuscript and the thesis advisory  
659 committee members Wolfgang Huber and Rob Russel (Heidelberg University) for  
660 stimulating discussions. We are grateful to Thomas Hoffmann and Jurij Pečar (IT  
661 Services) for set-up and maintenance of the high-performance computational  
662 environment at EMBL.

663

## 664 **Competing financial interests**

665 The authors declare that no competing financial interests exist.

666

## 667 **5. Appendix**

### 668 **5.1. Statistical model**

669 For each voxel in the reconstructed 3D volume, where the voxels are indexed with  
670  $i,j,k$ , the intensity  $X_{i,j,k}$  is modeled as

671

$$672 \quad X_{i,j,k} = \mu_{i,j,k} + \epsilon_{i,j,k} \quad (1),$$

673

674 with  $\epsilon_{i,j,k}$  a real valued random variable representing the background noise with mean  
675  $\mu_{0,i,j,k} \in \mathbb{R}$  and variance  $\sigma_{i,j,k}^2 \in \mathbb{R}_{>0}$  and where  $\mu_{i,j,k} \in \mathbb{R}$  is the true intensity as  
676 observed without background noise.



677 We developed an algorithm by means of multiple hypothesis testing, that controls the  
678 maximum amount of false positive signal in the map, i.e. the FDR with respect to  
679 background noise. First, we limit the tested voxels to the reconstruction sphere and  
680 voxels located outside of a diameter larger than the box size are disregarded as they  
681 arise from a smaller subset of averaged images than the voxels inside. Second, we  
682 focus on the detection of voxels with positive deviations from background noise (see  
683 section 3.2). In addition, voxels that contain significant signal are affected by further  
684 sources of noise like flexibility, incomplete binding of ligands and structural  
685 heterogeneity, leading to intensity variations of the signal. Consequently, these  
686 sources lead to an increase of the variance for these voxels as part of incoherent  
687 signal, which we do not consider here as it is going beyond the scope of detecting  
688 signal beyond background. Background noise of experimental cryo-EM data, however,  
689 poses principal challenges to the statistician, as it can result in non-uniform  
690 distributions across the map: although background noise variances from images of  
691 uniform noise over the pixels can be assumed uniform over the central sphere (**Fig.**  
692 **S3c right**), background noise outside the particle is higher when compared with  
693 background noise affecting the particle itself due to solvent displacement and  
694 variations of relative ice thickness at the particle (Penczek *et al.*, 2006). Therefore,  
695 estimating noise in the solvent region outside the particle could lead to an  
696 overestimation of the actual influence of the background noise on the particle (see  
697 section 3.4). Although this may cause several problems for comprehensive  
698 probabilistic modelling, these estimates can be interpreted as conservative bounds for  
699 the signal significance of the particle over background noise. For this reason, we use  
700 multiple hypothesis testing in order to calculate these upper bounds for detection  
701 errors of false positive rates, as we prove in Proposition 1. In cases when alternative  
702 noise estimates are available, they can be supplied as additional input to the  
703 procedure in order to generate confidence maps.

704

705 For each voxel a  $z$ -test is carried out, which identifies significant deviations from  
706 background noise. The value of the test statistic  $Z$  at each voxel is then given as

707

708 
$$Z_{i,j,k} = \frac{x_{i,j,k} - \mu_{0,i,j,k}}{\sigma_{i,j,k}} \quad (2),$$

709

710 where  $x_{i,j,k} \in \mathbb{R}$  is the reconstructed mean intensity at the respective voxel. We are  
711 testing for true intensity  $\mu_{i,j,k}$  higher than 0, thus the null and alternative hypotheses  
712 for each voxel become

713

$$714 \quad H_0: \mu_{i,j,k} = 0 \quad (3).$$

$$715 \quad H_1: \mu_{i,j,k} > 0$$

716

717 The null hypothesis  $H_0$  states that the true intensity  $\mu_{i,j,k}$  at the respective voxel is 0,  
718 i.e. no signal beyond background noise, while the second hypothesis  $H_1$  states the  
719 deviation towards higher values. Testing for deviations towards negative values, i.e.  
720 negative densities, is easily accomplished in this setting by multiplying the normalized  
721 map intensities  $z_{i,j,k}$  with  $-1$ , leading to a left-sided test procedure. Both options can  
722 be chosen by the user.

723 Under the null hypothesis  $H_0$  and by approximating the background noise with a  
724 Gaussian distribution (Kucukelbir *et al.*, 2014; Vilas *et al.*, 2018), the test statistic  $Z$   
725 follows a standard Gaussian distribution. The  $p$ -values in our procedure are then  
726 calculated as

727

$$728 \quad p_{i,j,k} = \begin{cases} P(Z_{i,j,k} \geq z_{i,j,k} | H_0) = 1 - \Phi(z_{i,j,k}), & \text{if } x_{i,j,k} \geq \tilde{\mu} \\ 1, & \text{if } x_{i,j,k} < \tilde{\mu} \end{cases} \quad (4),$$

729

730 with  $Z_{i,j,k}$  being the random variable representing the test statistic at voxel  $i,j,k$ ,  $z_{i,j,k}$   
731 the particular realization,  $\tilde{\mu}$  the background noise as estimated from the solvent area  
732 and the cumulative distribution function  $\Phi()$  of the standard Gaussian distribution.  
733 Alternatively,  $p$ -values can also be calculated in a non-parametric way without any  
734 assumptions about the underlying background noise distribution by simply replacing  
735 the cumulative distribution function  $\Phi()$  of the standard Gaussian distribution with the  
736 empirical cumulative distribution function  $\hat{F}()$  estimated from the sample of  
737 background noise, given as

738

739 
$$\hat{F}(t) = \frac{\text{number of elements in the sample} \leq t}{\text{total number of elements in the sample}}, \quad t \in \mathbb{R} \quad (5).$$

740

741 This allows the complete procedure to be carried out without any distribution  
742 assumptions. However, comparisons show that the background noise can be well  
743 approximated with a Gaussian distribution even in the tail areas, which are most  
744 important for the calculation  $p$ -values (see section 3.2, **Fig. 1b and S3a**). The  
745 respective method for  $p$ -value calculation, i.e. non-parametric or with Gaussian  
746 assumption, can be chosen by the user. All presented cases in the manuscript, if not  
747 stated differently, were calculated with the assumption of Gaussian distributed  
748 background noise. Note, the here defined  $p$ -values differ only marginally from the  $p$ -  
749 values commonly used for one-sided testing in a way that for all voxels with intensities  
750 smaller than the expected mean noise level  $\mu_0$  their value is here set to one. This  
751 definition allows the control of the FDR in the more general setting of allowed  
752 overestimated mean and variance (see Proposition 1).

753

## 754 **5.2. Multiple testing correction**

755 The respective hypothesis tests are applied to each voxel in the 3D volume. To  
756 account for the multiple testing problem with up to more than a million tests, we choose  
757 to control the FDR. Control in this context is meant in giving upper bounds for the  
758 occurring error. The FDR is defined as the expected amount of false rejections, i.e.

759

760 
$$FDR := \begin{cases} \mathbb{E}\left(\frac{V}{V+R}\right), & \text{if } V + R \neq 0 \\ 0, & \text{if } V + R = 0 \end{cases} \quad (6),$$

761

762 with  $V \in \mathbb{N}_0$  the number of false rejections,  $R \in \mathbb{N}_0$  the number of true rejections and  
763  $\mathbb{E}()$  denotes the expectation value. Due to dependencies between hypotheses at  
764 voxels close to each other, we choose the Benjamini-Yekutieli procedure (Benjamini  
765 & Yekutieli, 2001), giving an FDR-adjusted  $p$ -value for each voxel, which are often  
766 referred to as  $q$ -values. To describe the adjustment of  $p$ -values according to Benjamini  
767 and Yekutieli in more detail and for the ease of notation, we will now use a sequence  
768 of voxels from the map and denote the number of hypotheses, i.e. tested voxels, with

769  $m$ . The  $p$ -values  $p_i, i = 1, \dots, m$  are then sorted, from small to large, resulting in sorted  
 770  $p$ -values  $p_{(i)}, i = 1, \dots, m$ .  $q$ -values are then calculated as

771

$$772 \quad q_{(i)} = \min_{i \leq k \leq m} \left( p_{(k)} \frac{m}{k} \gamma \right) \quad (7),$$

773

774 with  $m$  the number of hypotheses,  $k$  a running index and  $\gamma = \sum_{i=1}^m \frac{1}{i}$ . By recognizing  
 775 the correct index in the sequence of voxels for each index  $(i)$ ,  $i = 1, \dots, m$  in the sorted  
 776 array and subsequent conversion into the 3D volume, we can assign each voxel  
 777 position  $i, j, k$  its corresponding  $q$ -value. In order to interpret the resulting map, the  $q$ -  
 778 value for each voxel then gives the minimal FDR that has to be imposed at the  
 779 thresholding in order to call the respective voxel a significant deviation from the  
 780 background. The final value associated with voxel  $i, j, k$ ,  $q'_{i,j,k}$ , is then calculated as

781

$$782 \quad q'_{i,j,k} = 1 - q_{i,j,k} \quad (8),$$

783

784 where  $q_{i,j,k}$  is the  $q$ -value at the voxel indexed with  $i, j, k$ . Thus, visualization of the map  
 785 at a value of 0.99 corresponds to a maximal FDR of 1%, or a minimal PPV of 99%,  
 786 and therefore means that from all the visible voxels at this threshold, a maximum of  
 787 1% are expected to be background noise.

788

789 Next, we show that the presented procedure with  $p$ -values as defined above controls  
 790 the FDR even in the case of overestimated background noise, i.e. by using the  
 791 possibly overestimated background noise estimates from the solvent area in Equation  
 792 (2) for all voxels.

793

794 *Proposition 1:*

795 *Consider Gaussian distributed random variables representing the background noise*  
 796 *at all voxels  $i, j, k$  in the 3D map with true mean  $\mu_{0,i,j,k} \in \mathbb{R}$  and variance  $\sigma_{i,j,k}^2 \in \mathbb{R}_{>0}$ .*

797 *Moreover, let  $\tilde{\mu} \geq \mu_{0,i,j,k}$  and  $\tilde{\sigma}^2 \geq \sigma_{i,j,k}^2, \tilde{\mu} \in \mathbb{R}, \tilde{\sigma}^2 \in \mathbb{R}_{>0}$  for all  $i, j, k$ , the overestimated*  
 798 *background noise parameters. Then  $\widetilde{q_{i,j,k}} \geq q_{i,j,k}$ , where  $\widetilde{q_{i,j,k}}$  corresponds to the  $q$ -*

799 value as defined in Equation (7) and calculated with our procedure with parameters  
 800  $\tilde{\mu}$ ,  $\tilde{\sigma}^2$ , and  $q_{i,j,k}$  the  $q$ -value, as obtained with the true parameters  $\mu_{0,i,j,k}$  and  $\sigma_{i,j,k}^2$ .

801

802 Proof:

803 In order to prove the statement, we will now recapitulate the algorithm and prove the  
 804 inequality at all necessary steps. We start showing that the true  $p$ -value at voxel  
 805 position  $i, j, k$ ,  $p_{i,j,k}$ , is smaller when compared with the  $p$ -value  $\widetilde{p}_{i,j,k}$  calculated from  
 806 the overestimated background noise parameters using Equation (4). In other words,  
 807 we want to show that  $p_{i,j,k} \leq \widetilde{p}_{i,j,k}$  or equivalent to that,  $\widetilde{p}_{i,j,k} - p_{i,j,k} \geq 0$ . If  $x_{i,j,k} <$   
 808  $\tilde{\mu}$ , then the statement is trivial, because  $\widetilde{p}_{i,j,k} = 1$  and  $p_{i,j,k} \leq 1$ , which is a general  
 809 property of  $p$ -values.

810 For  $x_{i,j,k} \geq \tilde{\mu}$ , considering Equations (2) and (4), it follows:

811

$$812 \quad \widetilde{p}_{i,j,k} - p_{i,j,k} = 1 - \frac{1}{2} \left( 1 + \operatorname{erf} \left( \frac{x_{i,j,k} - \tilde{\mu}}{\sqrt{2} \tilde{\sigma}} \right) \right) - 1 + \frac{1}{2} \left( 1 + \operatorname{erf} \left( \frac{x_{i,j,k} - \mu_{0,i,j,k}}{\sqrt{2} \sigma_{i,j,k}} \right) \right) =$$

$$813 \quad -\frac{1}{2} \operatorname{erf} \left( \frac{x_{i,j,k} - \tilde{\mu}}{\sqrt{2} \tilde{\sigma}} \right) + \frac{1}{2} \operatorname{erf} \left( \frac{x_{i,j,k} - \mu_{0,i,j,k}}{\sqrt{2} \sigma_{i,j,k}} \right) \quad (9).$$

814

815 As the error function  $\operatorname{erf}()$  is monotonically increasing, it is sufficient to show that  
 816  $\frac{x_{i,j,k} - \mu_{0,i,j,k}}{\sqrt{2} \sigma_{i,j,k}} \geq \frac{x_{i,j,k} - \tilde{\mu}}{\sqrt{2} \tilde{\sigma}}$ . Because  $x_{i,j,k} - \tilde{\mu} \geq 0$  and thus also  $x_{i,j,k} - \mu_{0,i,j,k} \geq 0$ , as well as  
 817  $\tilde{\sigma} \geq \sigma_{i,j,k}$ , we have

818

$$819 \quad \frac{x_{i,j,k} - \mu_{0,i,j,k}}{\sqrt{2} \sigma_{i,j,k}} - \frac{x_{i,j,k} - \tilde{\mu}}{\sqrt{2} \tilde{\sigma}} = \frac{(x_{i,j,k} - \mu_{0,i,j,k}) \tilde{\sigma} - (x_{i,j,k} - \tilde{\mu}) \sigma}{\sqrt{2} \tilde{\sigma} \sigma_{i,j,k}} \geq \frac{(x_{i,j,k} - \mu_{0,i,j,k}) \sigma - (x_{i,j,k} - \tilde{\mu}) \sigma}{\sqrt{2} \tilde{\sigma} \sigma_{i,j,k}} =$$

$$820 \quad \frac{(-\mu_{0,i,j,k} + \tilde{\mu}) \sigma}{\sqrt{2} \tilde{\sigma} \sigma_{i,j,k}} \geq 0 \quad (10),$$

821

822 where in the last inequality it was used that  $\tilde{\mu} \geq \mu_{0,i,j,k}$  and  $\tilde{\sigma} \geq \sigma_{i,j,k} > 0$ . This gives  
 823 the desired result of  $\widetilde{p}_{i,j,k} \geq p_{i,j,k}$ .

824 Recapitulating the calculation of  $q$ -values in Equation (7) together with the conversion  
 825 of the 3D volume to a sequence, it follows:

826

$$827 \quad q_{(a)} = \min_{a \leq k \leq m} \left( p_{(k)} \frac{m}{k} \gamma \right) \leq \min_{a \leq k \leq m} \left( \widetilde{p}_{(k)} \frac{m}{k} \gamma \right) = \widetilde{q}_{(a)}, \quad a = 1, \dots, m \quad (11),$$

828

829 with  $m$  the number of hypotheses,  $k$  a running index and  $\gamma = \sum_{l=1}^m \frac{1}{l}$ . This gives the  
830 desired result:

831

$$832 \quad \widetilde{q}_{i,j,k} \geq q_{i,j,k} \quad (12).$$

833

□

834

835 As the Benjamini-Yekutieli procedure controls the FDR when using true parameters,  
836 our procedure (i.e. Benjamini-Yekutieli applied to the modified  $p$ -values) will give a  
837 more conservative estimate of the FDR (as shown in Proposition 1). Therefore, our  
838 algorithm controls the FDR sufficiently well by giving an upper conservative bound for  
839 the FDR. Thus, Proposition 1 states that even in the setting of non-uniform background  
840 noise with higher noise levels in the region of background noise estimation, the FDR  
841 is controlled and thus robust in the sense that the maximum FDR is still guaranteed.  
842 Furthermore, it has to be mentioned that estimates of the background noise levels are  
843 not the only factor contributing to FDR estimation. Both the number voxels as well as  
844 their dependencies within the map have an important influence and are considered in  
845 the FDR-adjustment. This makes the generation of confidence maps even with  
846 severely overestimated background noise parameters a powerful procedure (**Fig. S6**),  
847 where powerful is used here in its statistical sense of decreasing the error of missing  
848 true signal. However, the power of the procedure can be even increased, i.e. the  
849 amount of true missed signal reduced while controlling the FDR, by including  
850 information about local resolutions, cutoffs in reciprocal space where no signal is  
851 expected beyond, while, at the same time, controlling the FDR.

852

### 853 **5.3. Testing with local filtering**

854 In the presence of extreme resolution variation, using uniformly sharpened and filtered  
855 maps will lead to confidence maps of insufficient representation of features in both  
856 areas of either lower than the average B-factor or higher than the average B-factor.

857 Therefore, in the next two sections, we will show how noise levels can be locally  
858 adjusted and subsequently estimated by inclusion of local resolution information as  
859 well as atomic B-factors and how this can be used to increase the power to detect  
860 weaker features while controlling the FDR. Local filtration of EM maps according to  
861 the local resolution (Cardone *et al.*, 2013) has been shown to be a powerful approach  
862 as it leads to local reductions of background noise. These variations of noise levels  
863 between different voxels at different resolutions from local filtering, can be also  
864 accounted for in the generation of confidence maps. For each voxel, a map duplicate  
865 volume is filtered at the corresponding resolution and the noise distribution estimated  
866 from the solvent area outside the particle. This procedure results in three 3D maps,  
867 the estimates of local variances of the background noise at each voxel after local  
868 filtration, the estimates of local means of the background noise at each voxel after  
869 local filtration and the locally filtered map. These three maps are subsequently used  
870 for the testing procedure. Thus, the value of the test statistic (2) is calculated by

871

$$872 \quad z_{i,j,k} = \frac{x_{i,j,k} - \tilde{\mu}_{i,j,k}}{\tilde{\sigma}_{i,j,k}} \quad (13),$$

873

874 where  $x_{i,j,k} \in \mathbb{R}$  is the intensity of the locally filtered map at voxel  $i, j, k$  and  $\tilde{\mu}_{i,j,k} \in \mathbb{R}$   
875 and  $\tilde{\sigma}_{i,j,k} \in \mathbb{R}_{>0}$  are the local mean and standard deviation estimate of the background  
876 noise at the respective voxel. All subsequent steps of the algorithm remain identical  
877 as well as the validity of Proposition 1.

878

#### 879 **5.4. Testing with local amplitude scaling**

880 As for the local filtration, local amplitude scaling gives rise to varying noise levels at  
881 different voxels. In order to obtain both mean and variance estimates for each voxel  
882 after local amplitude scaling, a duplicate window outside the particle containing pure  
883 noise is scaled according to the rolling window used in local amplitude scaling for each  
884 voxel, i.e. the amplitudes of the Fourier transform of the box containing pure noise at  
885 frequency  $s$ , denoted as  $F_{noise}(s)$ , are multiplied with a frequency dependent  
886 sharpening factor  $k(s) \in \mathbb{R}_{\geq 0}$ , which is consequently given as

887



$$888 \quad k(s) = \begin{cases} \frac{F_{\text{sharpened}}(s)}{F_{\text{observed}}(s)}, & \text{if } F_{\text{observed}}(s) \neq 0 \\ 0, & \text{if } F_{\text{observed}}(s) = 0 \end{cases} \quad (14),$$

889

890 where  $F_{\text{sharpened}}(s) \in \mathbb{R}_{\geq 0}$  and  $F_{\text{observed}}(s) \in \mathbb{R}_{\geq 0}$  are rotationally averaged amplitudes  
891 of the Fourier transform at frequency  $s$  given at the respective rolling window for the  
892 sharpened and the observed experimental map, respectively. The noise distribution is  
893 then estimated from the scaled noise sample. In analogy to the case of locally filtered  
894 maps, this procedure results again in three 3D maps of estimated means, variances  
895 and intensities of the locally sharpened map for each voxel that can be incorporated  
896 with Equation (13) in the testing procedure. Proposition 1 remains valid.

897

898

## 899 References

900 Adams, P. D., Afonine, P. V., Bunkóczi, G., Chen, V. B., Davis, I. W., Echols, N.,  
901 Headd, J. J., Hung, L.-W., Kapral, G. J., Grosse-Kunstleve, R. W., McCoy, A. J.,  
902 Moriarty, N. W., Oeffner, R., Read, R. J., Richardson, D. C., Richardson, J. S.,  
903 Terwilliger, T. C. & Zwart, P. H. (2010). *Acta Crystallogr D Biol Crystallogr.* **66**,  
904 213–221.

905 Allegretti, M., Mills, D. J., McMullan, G., Kühlbrandt, W. & Vonck, J. (2014). *eLife.* **3**,  
906 e01963–e01963.

907 Anderson, T. W. & Darling, D. A. (1954). *Journal of the American Statistical*  
908 *Association.* **49**, 765–769.

909 Appen, von, A., Kosinski, J., Sparks, L., Ori, A., DiGuilio, A. L., Vollmer, B.,  
910 Mackmull, M.-T., Banterle, N., Parca, L., Kastritis, P., Buczak, K., Mosalaganti,  
911 S., Hagen, W., Andrés-Pons, A., Lemke, E. A., Bork, P., Antonin, W., Glavy, J.  
912 S., Bui, K. H. & Beck, M. (2015). *Nature.* **526**, 140–143.

913 Bai, X.-C., Fernandez, I. S., McMullan, G. & Scheres, S. H. W. (2013). *eLife.* **2**,  
914 e00461.

915 Bai, X.-C., Yan, C., Yang, G., Lu, P., Ma, D., Sun, L., Zhou, R., Scheres, S. H. W. &  
916 Shi, Y. (2015). *Nature.* **525**, 212–217.

917 Bartesaghi, A., Aguerrebere, C., Falconieri, V., Banerjee, S., Earl, L. A., Zhu, X.,  
918 Grigorieff, N., Milne, J. L. S., Sapiro, G., Wu, X. & Subramaniam, S. (2018).  
919 *Structure.* **26**, 848–856.e3.

920 Bartesaghi, A., Matthies, D., Banerjee, S., Merk, A. & Subramaniam, S. (2014). *Proc*  
921 *Natl Acad Sci USA.* **111**, 11709–11714.

- 922 Bartesaghi, A., Merk, A., Banerjee, S., Matthies, D., Wu, X., Milne, J. L. S. &  
923 Subramaniam, S. (2015). *Science*. **348**, 1147–1151.
- 924 Benjamini, Y. & Hochberg, Y. (1995). *Journal of the Royal Statistical Society*. **57**,  
925 289–300.
- 926 Benjamini, Y. & Yekutieli, D. (2001). *The Annals of Statistics*. **29**, 1165–1188.
- 927 Briggs, J. A. (2013). *Curr Opin Struct Biol*. **23**, 261–267.
- 928 Burnley, T., Palmer, C. M. & Winn, M. (2017). *Acta Crystallogr D Struct Biol*. **73**,  
929 469–477.
- 930 Campbell, M. G., Veessler, D., Cheng, A., Potter, C. S. & Carragher, B. (2015). *eLife*.  
931 **4**, e01963.
- 932 Cardone, G., Heymann, J. B. & Steven, A. C. (2013). *J Struct Biol*. **184**, 226–236.
- 933 Chong, E. Y., Huang, Y., Wu, H., Ghasemzadeh, N., Uppal, K., Quyyumi, A. A.,  
934 Jones, D. P. & Yu, T. (2015). *Nature Publishing Group*. **5**, 17221.
- 935 Fitzpatrick, A. W. P., Falcon, B., He, S., Murzin, A. G., Murshudov, G., Garringer, H.  
936 J., Crowther, R. A., Ghetti, B., Goedert, M. & Scheres, S. H. W. (2017). *Nature*.  
937 **547**, 185–190.
- 938 Frank, J. & Liu, W. (1995). *J. Opt. Soc. Am. a, JOSAA*. **12**, 2615–2627.
- 939 Fromm, S. A., Bharat, T. A. M., Jakobi, A. J., Hagen, W. J. H. & Sachse, C. (2015). *J*  
940 *Struct Biol*. **189**, 87–97.
- 941 Galej, W. P., Wilkinson, M. E., Fica, S. M., Oubridge, C., Newman, A. J. & Nagai, K.  
942 (2016). *Nature*. **537**, 197–201.
- 943 Ge, P. & Zhou, Z. H. (2011). *Proc Natl Acad Sci USA*. **108**, 9637–9642.
- 944 Genovese, C. R., Lazar, N. A. & Nichols, T. (2002). *Neuroimage*. **15**, 870–878.
- 945 Gremer, L., Schölzel, D., Schenk, C., Reinartz, E., Labahn, J., Ravelli, R. B. G.,  
946 Tusche, M., Lopez-Iglesias, C., Hoyer, W., Heise, H., Willbold, D. & Schröder, G.  
947 F. (2017). *Science*. **358**, 116–119.
- 948 Hoffmann, N. A., Jakobi, A. J., Moreno-Morcillo, M., Glatt, S., Kosinski, J., Hagen, W.  
949 J. H., Sachse, C. & Müller, C. W. (2015). *Nature*. **528**, 231–236.
- 950 Jakobi, A. J., Wilmanns, M. & Sachse, C. (2017). *eLife*. **6**, 213.
- 951 Khoshouei, M., Radjainia, M., Baumeister, W. & Danev, R. (2017). *Nat Commun*. **8**,  
952 16099.
- 953 Kucukelbir, A., Sigworth, F. J. & Tagare, H. D. (2014). *Nat Methods*. **11**, 63–65.

- 954 Lee, C.-H. & MacKinnon, R. (2017). *Cell*. **168**, 111–120.e111.
- 955 Li, X., Mooney, P., Zheng, S., Booth, C. R., Braunfeld, M. B., Gubbens, S., Agard, D.  
956 A. & Cheng, Y. (2013). *Nat Methods*. **10**, 584–590.
- 957 Liao, M., Cao, E., Julius, D. & Cheng, Y. (2013). *Nature*. **504**, 107–112.
- 958 Lyumkis, D., Brilot, A. F., Theobald, D. L. & Grigorieff, N. (2013). *J Struct Biol*. **183**,  
959 377–388.
- 960 Mahamid, J., Pfeffer, S., Schaffer, M., Villa, E., Danev, R., Cuellar, L. K., Förster, F.,  
961 Hyman, A. A., Plitzko, J. M. & Baumeister, W. (2016). *Science*. **351**, 969–972.
- 962 McGoldrick, L. L., Singh, A. K., Saotome, K., Yelshanskaya, M. V., Twomey, E. C.,  
963 Grassucci, R. A. & Sobolevsky, A. I. (2018). *Nature*. **553**, 233–237.
- 964 McMullan, G., Faruqi, A. R. & Henderson, R. (2016). *Meth Enzymol*. **579**, 1–17.
- 965 Merk, A., Bartesaghi, A., Banerjee, S., Falconieri, V., Rao, P., Davis, M. I., Pragani,  
966 R., Boxer, M. B., Earl, L. A., Milne, J. L. S. & Subramaniam, S. (2016). *Cell*. **165**,  
967 1698–1707.
- 968 Miller, C. J., Genovese, C., Nichol, R. C., Wasserman, L., Connolly, A., Reichart, D.,  
969 Hopkins, A., Schneider, J. & Moore, A. (2001). *The Astronomical Journal*. **122**,  
970 3492–3505.
- 971 Murshudov, G. N. (2016). *Meth Enzymol*. 277–305.
- 972 Namba, K. & Stubbs, G. (1986). *Science*. **231**, 1401–1406.
- 973 Patwardhan, A. (2017). *Acta Crystallogr D Struct Biol*. **73**, 503–508.
- 974 Penczek, P. A. (2002). *J Struct Biol*. **138**, 34–46.
- 975 Penczek, P. A. (2010). *Meth Enzymol*.
- 976 Penczek, P. A., Yang, C., Frank, J. & Spahn, C. M. T. (2006). *J Struct Biol*. **154**,  
977 168–183.
- 978 Pettersen, E. F., Goddard, T. D., Huang, C. C., Couch, G. S., Greenblatt, D. M.,  
979 Meng, E. C. & Ferrin, T. E. (2004). *J Comput Chem*. **25**, 1605–1612.
- 980 Ploner, A., Calza, S., Gusnanto, A. & Pawitan, Y. (2006). *Bioinformatics*. **22**, 556–  
981 565.
- 982 Punjani, A., Rubinstein, J. L., Fleet, D. J. & Brubaker, M. A. (2017). *Nat Methods*. **14**,  
983 290–296.
- 984 Rosenthal, P. B. & Henderson, R. (2003). *J Mol Biol*. **333**, 721–745.

- 985 Sachse, C., Chen, J. Z., Coureux, P.-D., Stroupe, M. E., Fändrich, M. & Grigorieff, N.  
986 (2007). *J Mol Biol.* **371**, 812–835.
- 987 Saxton, W. O. & Baumeister, W. (1982). *J Microsc.* **127**, 127–138.
- 988 Scheres, S. H. W. (2012a). *J Mol Biol.* **415**, 406–418.
- 989 Scheres, S. H. W. (2012b). *J Struct Biol.* **180**, 519–530.
- 990 Schur, F. K. M., Obr, M., Hagen, W. J. H., Wan, W., Jakobi, A. J., Kirkpatrick, J. M.,  
991 Sachse, C., Kräusslich, H.-G. & Briggs, J. A. G. (2016). *Science.* **353**, 506–508.
- 992 Sigworth, F. J. (1998). *J Struct Biol.* **122**, 328–339.
- 993 Unwin, N. (2005). *J Mol Biol.* **346**, 967–989.
- 994 van Heel, M., Keegstra, W., Schutter, W. & Van Bruggen, E. (1982). Arthropod  
995 hemocyanin structures studied by image analysis *Life Chemistry Reports*.
- 996 Vilas, J. L., Gómez-Blanco, J., Conesa, P., Melero, R., Miguel de la Rosa-Trevín, J.,  
997 Otón, J., Cuenca, J., Marabini, R., Carazo, J. M., Vargas, J. & Sorzano, C. O. S.  
998 (2018). *Structure.* **26**, 337–344.e4.
- 999 Walt, S., Colbert, S. C. & Varoquaux, G. (2011). *Computing in Science &*  
1000 *Engineering.* **13**, 22–30.
- 1001 Wheatley, R. W., Juers, D. H., Lev, B. B., Huber, R. E. & Noskov, S. Y. (2015). *Phys*  
1002 *Chem Chem Phys.* **17**, 10899–10909.
- 1003 Yonekura, K., Maki-Yonekura, S. & Namba, K. (2003). *Nature.* **424**, 643–650.
- 1004 Yu, X., Jin, L. & Zhou, Z. H. (2008). *Nature.* **453**, 415–419.
- 1005 Zhang, X., Settembre, E., Xu, C., Dormitzer, P. R., Bellamy, R., Harrison, S. C. &  
1006 Grigorieff, N. (2008). *Proc Natl Acad Sci USA.* **105**, 1867–1872.
- 1007 Zhao, J., Beyrakhova, K., Liu, Y., Alvarez, C. P., Bueler, S. A., Xu, L., Xu, C.,  
1008 Boniecki, M. T., Kanelis, V., Luo, Z.-Q., Cygler, M. & Rubinstein, J. L. (2017).  
1009 *PLoS Pathog.* **13**, e1006394.
- 1010
- 1011

Figure 1

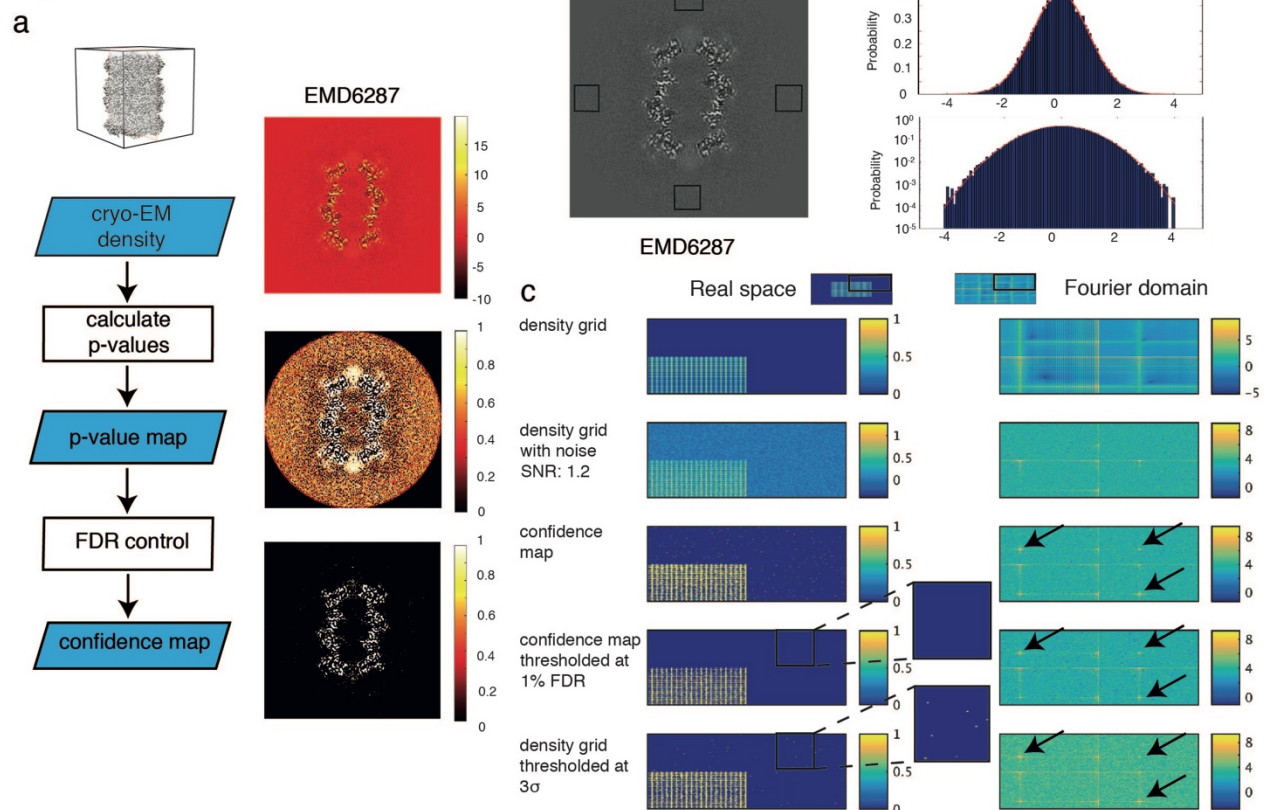

1012

1013 **Fig. 1. False discovery rate (FDR) analysis of cryo-EM maps.**

1014 (a) Left. Flowchart of confidence map generation: the cryo-EM map is converted to  $p$ -  
1015 values and finally FDR controlled. Right. Slice views through a cryo-EM map of 20S  
1016 proteasome (EMD6287) depicted at the respective stages of the algorithm (blue  
1017 boxes) on the left. Note, the strong increase in contrast when the sharpened map is  
1018 converted to the confidence map. (b) Left. Estimation of the background noise from  
1019 windows (red) outside the particle. Right. Histograms (top. probability in linear scale,  
1020 bottom. probability in log-scale) of the background window together with the probability  
1021 density function of the estimated Gaussian distribution. (c) Evaluation of the algorithm  
1022 on a simulated 2D density grid. The upper right quadrant of images in real space (left  
1023 column) together with the corresponding power spectrum in the Fourier domain (right  
1024 column) are displayed. Density grid with added normally distributed noise at a signal-  
1025 to-noise ratio of 1.2 leads to loss of contrast at high resolution. Confidence maps  
1026 recapitulate these high-resolution features (arrows), showing that high-resolution  
1027 signal is detected with high sensitivity. FDR thresholding at 1 % recovers a similar  
1028 binary grid in comparison with  $3\sigma$ -thresholding while minimizing noise contributions  
1029 while minimizing detected noise (zoomed insets).



1030

Figure 2

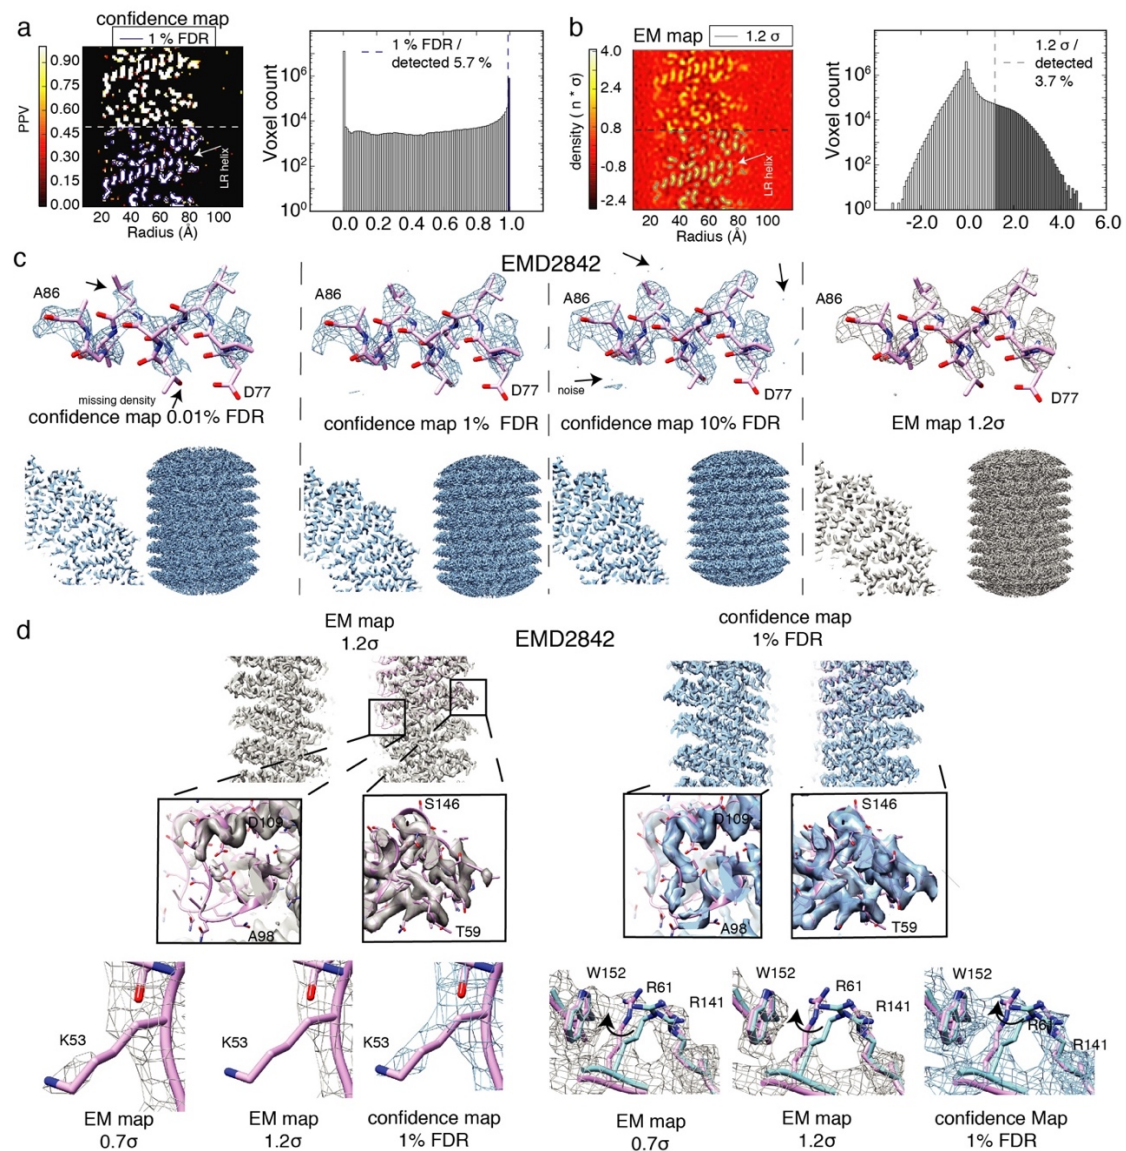

1031

1032 **Fig. 2. Confidence maps separate signal from noise for molecular density**  
 1033 **interpretation.**

1034 (a) Left. Confidence map with longitudinal section through TMV coat protein displayed  
 1035 indicating  $\alpha$ -helical pitch of LR helix. Lower half shows the chosen contour at 1 % FDR  
 1036 in blue with 5.7 % of voxels detected. Right. Corresponding histogram of confidence  
 1037 map with signal separated above 0.99 PPV (1 % FDR). (b) Left. Same section as in  
 1038 (a) from cryo-EM density and the recommended threshold contoured at 1.2  $\sigma$  in gray  
 1039 with 3.7 % of voxels detected. Right. Corresponding histogram of cryo-EM density with  
 1040 thresholded values displayed in gray. (c) Isosurface rendered of thresholded  
 1041 confidence maps at 0.01 %, 1 % and 10 % FDR (left, center left, center right) shown

1042 in blue and sharpened cryo-EM density with  $1.2\sigma$  threshold (right) in gray from TMV  
 1043 (EMD2842). Shown are helix A86 – D77 (top), quarter cross section (bottom left) and  
 1044 side view (bottom right) of TMV map. (d) Detailed analysis of TMV density. Slice view  
 1045 through TMV rod with zoomed inset for inner and outer radii density (top). K53 side  
 1046 chain density (left) and molecular environment of R61 side chains (right) at  $0.7, 1.2 \sigma$   
 1047 threshold and at 1 % FDR confidence map.

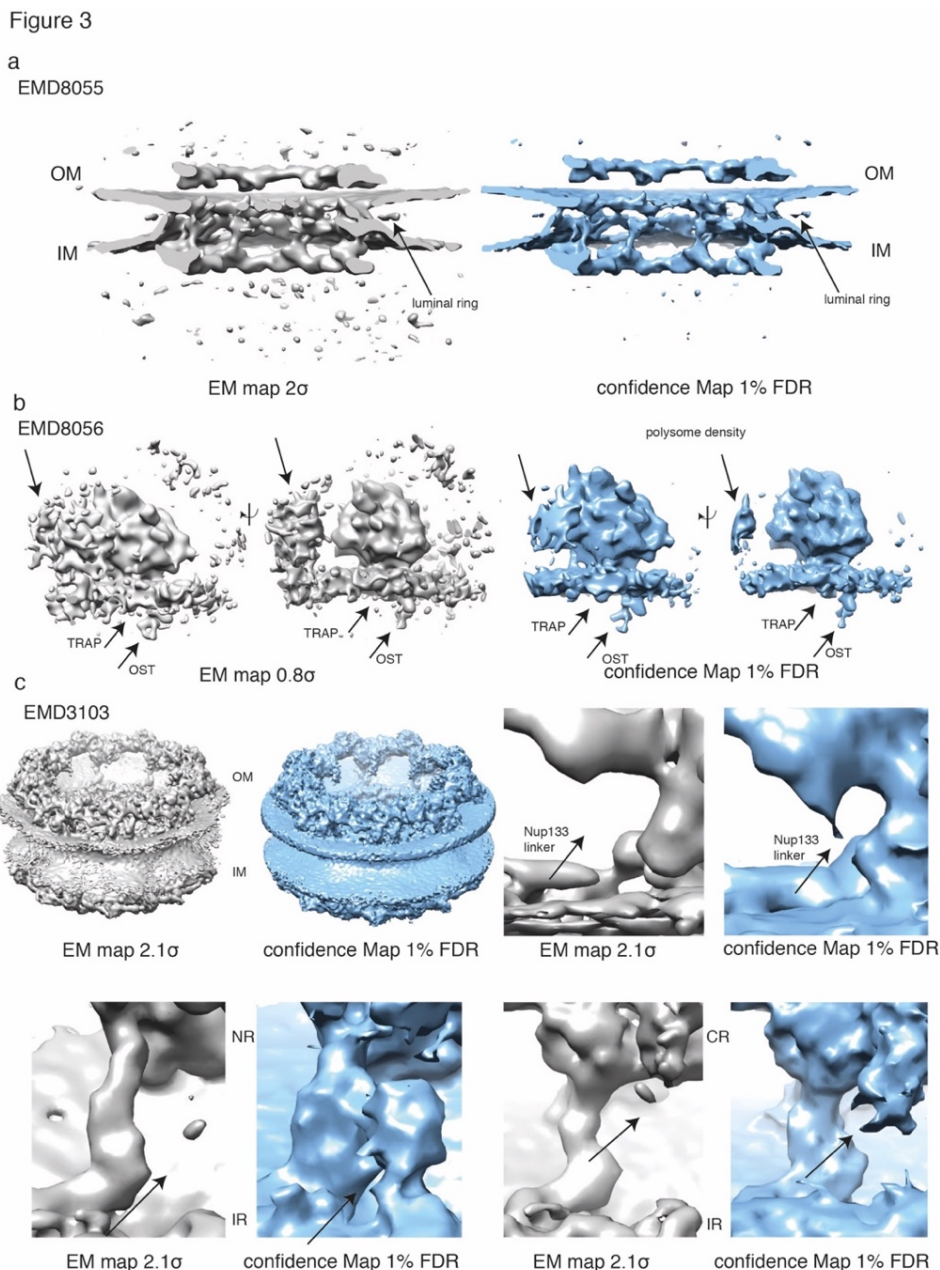

1048

1049 **Fig. 3. Confidence maps from subtomogram averages**

1050 (a) Nuclear pore structure at  $90 \text{ \AA}$  (EMD 8055) from 8 pore particles: cryo-EM map at  
 1051  $2.0\sigma$  threshold (left, gray) and confidence map at 1 % FDR threshold (right, blue).

1052 Note, the confidence map minimizes appearance of noise. (b) ER-associated



1053 ribosome structure at 35 Å resolution (EMD 8056) in two side views at 0.8 $\sigma$  threshold  
1054 (left) and 1 % FDR confidence map (right). Note, in confidence maps weaker densities  
1055 assigned to peripheral protein complexes TRAP and OST (arrows) can be easily  
1056 visualized in the absence of noise. (c) Nuclear pore structure at 23 Å resolution (EMD  
1057 3103) comparing cryo-EM map at 2.1 $\sigma$  threshold (left) and 1 % FDR confidence map  
1058 (right). Comparison of map pairs for Nup133 linker density (top right), densities located  
1059 between inner and nuclear ring (bottom left) and inner and cytoplasmic ring (bottom  
1060 right). In contrast to sharpened cryo-EM maps at 2.1 $\sigma$  threshold, confidence maps  
1061 show consistently densities at the connections between the inner and outer rings at 1  
1062 % FDR threshold (arrows).

Figure 4

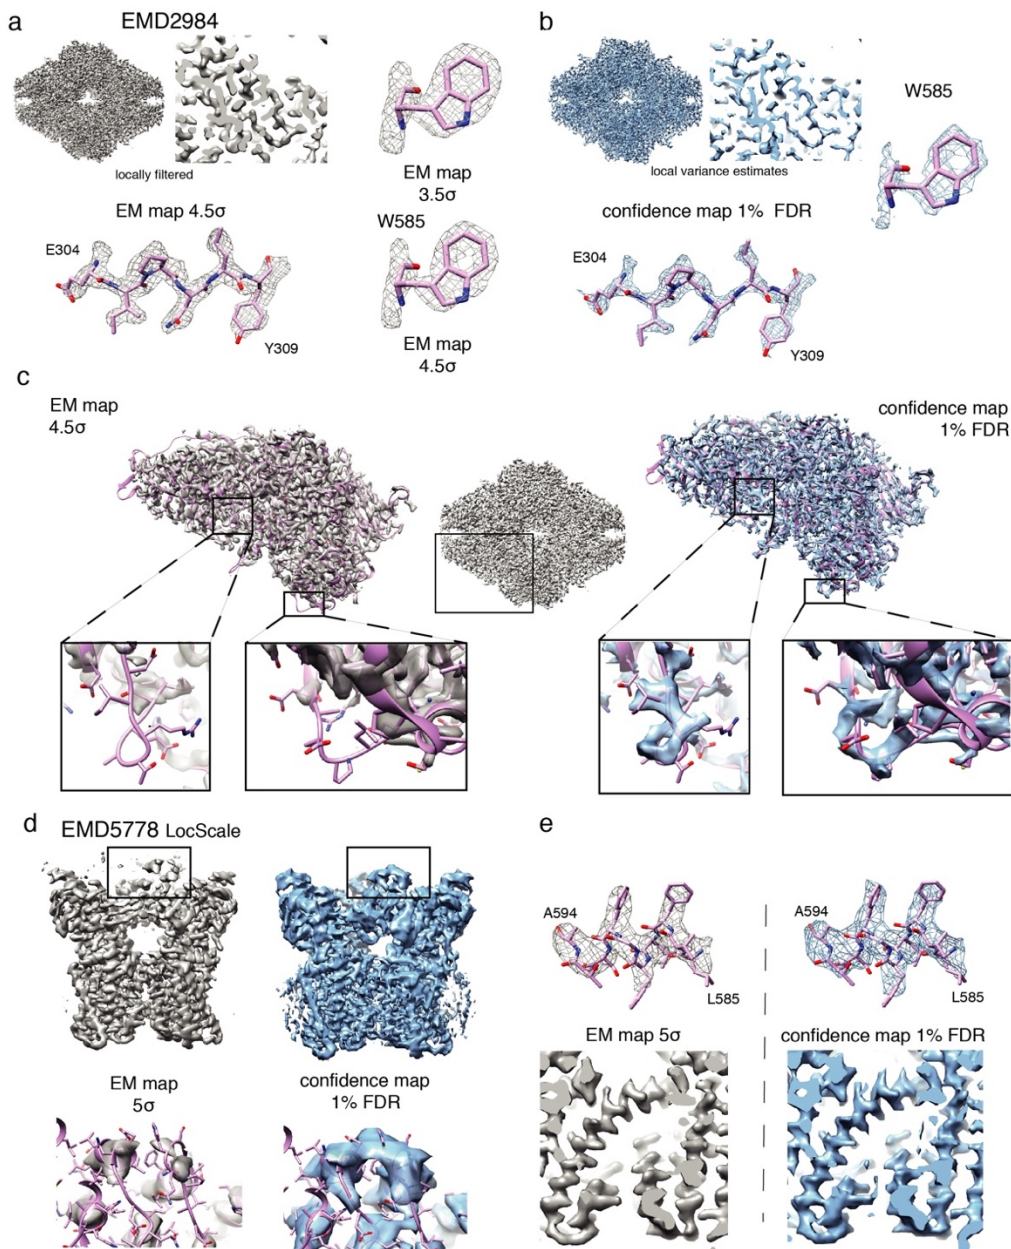

1063

1064 **Fig. 4. Confidence maps benefit from local SNR adjustment based on local**  
1065 **resolution.**

1066 (a)  $\beta$ -galactosidase (EMD 2984) locally filtered cryo-EM map left (gray) displayed at  
1067  $4.5\sigma$  threshold and (b) confidence map (blue) including signal-to-noise adjustment  
1068 based on local resolution at 1% FDR threshold (right) in side view and cross section.  
1069 High resolution features like E304 – E398 and holes in aromatic rings W585 in the  
1070  $3.5/4.5 \sigma$ -thresholded cryo-EM map (a) in comparison with the 1% FDR confidence  
1071 map (b). (c) Comparison of density features from peripheral loop regions not covered  
1072 by density in the locally filtered cryo-EM map (left) compared with the 1% FDR

1073 confidence map that shows densities for the respective loops. (d) TRPV1 (EMD5778)  
1074 side view (top) with zoom-in to peripheral cytoplasmic domain density (bottom)  
1075 comparing LocScale density displayed at  $5\sigma$  threshold (left) and 1 %FDR confidence  
1076 map. (e) Detailed density stretch A594 – L585 (top) and transmembrane helix S5  
1077 including S4-S5 linker (bottom) comparing LocScale density and 1 % FDR confidence  
1078 map.

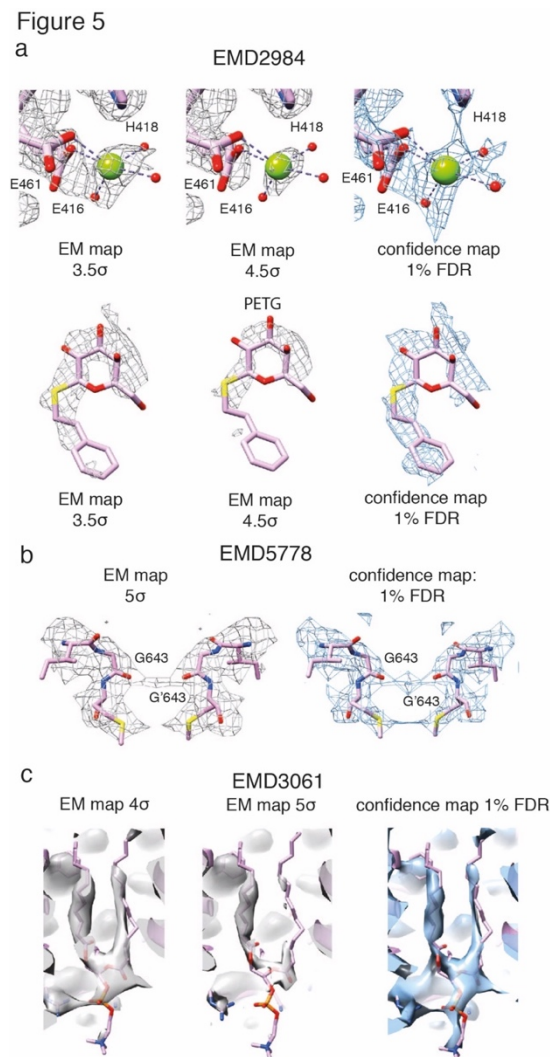

1079

1080 **Fig. 5. Confidence maps confirm localization of non-protein components.**

1081 (a)  $\beta$ -galactosidase (EMD 2984) with  $3.5/4.5 \sigma$ -thresholded cryo-EM map (left, center,  
1082 gray) and 1 % FDR thresholded confidence map (right, blue):  $Mg^{2+}$  ion coordinated by  
1083 E461, E416, H418 and 3  $H_2O$  molecules (top). Density of bound PETG ligand the  
1084  $3.5/4.5 \sigma$ -thresholded cryo-EM map and in the 1% FDR confidence map (bottom). (b)  
1085 TRPV1 channel (EMD 5778) with  $5 \sigma$ -thresholded cryo-EM map (left) and 1 % FDR  
1086 thresholded confidence map (right): selectivity filter formed by carbonyls of symmetry-

1087 related G643 residues. The presence of a putative ion is supported by the confidence  
1088 map. (c)  $\gamma$ -secretase (EMD 3061) with  $4\sigma$  and  $5\sigma$ -thresholded cryo-EM map (left) and  
1089 1 % FDR thresholded confidence map (right): The confidence map reveals density for  
1090 both acyl chains of phosphatidyl choline at a single threshold.

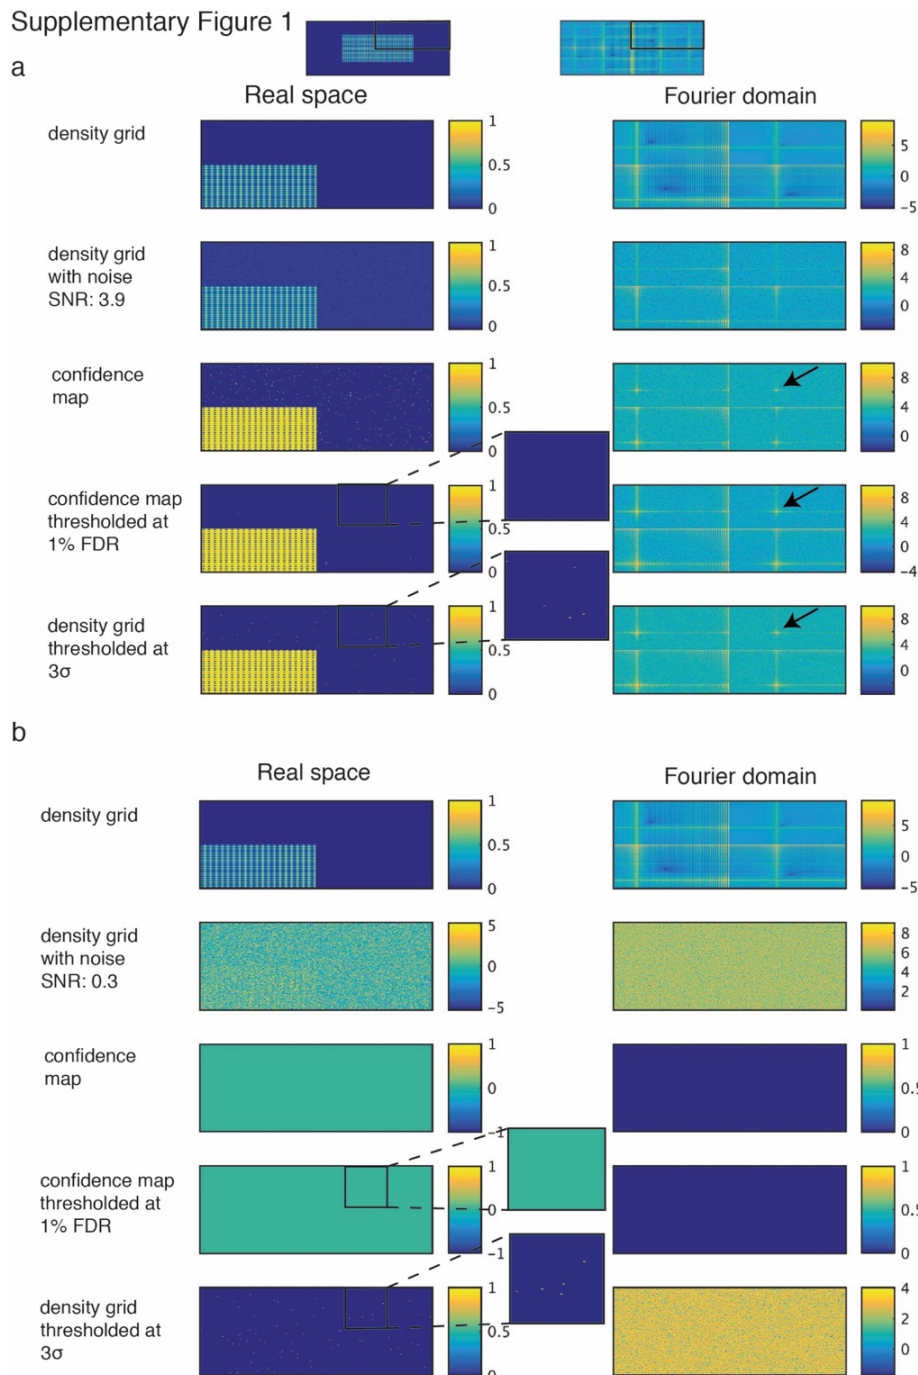

1091

1092 **Fig. S1. Comparison of  $\sigma$  and FDR thresholding of simulated density grids with**  
1093 **varying signal-to-noise ratios.**

1094 Thresholding with simulated density grids at signal-to-noise ratios and variance of (a)  
1095 3.9 (0.01) and (b) 0.3 (1.33), respectively. The same simulations as in Fig. 1c are



1096 repeated with lower and higher variances of the background noise. At low signal-to-  
1097 noise ratio, the 1% FDR thresholding is devoid of false positives whereas conventional  
1098  $3\sigma$ -thresholding approach yields many false positive pixels (zoomed inset).

Supplementary Figure 2

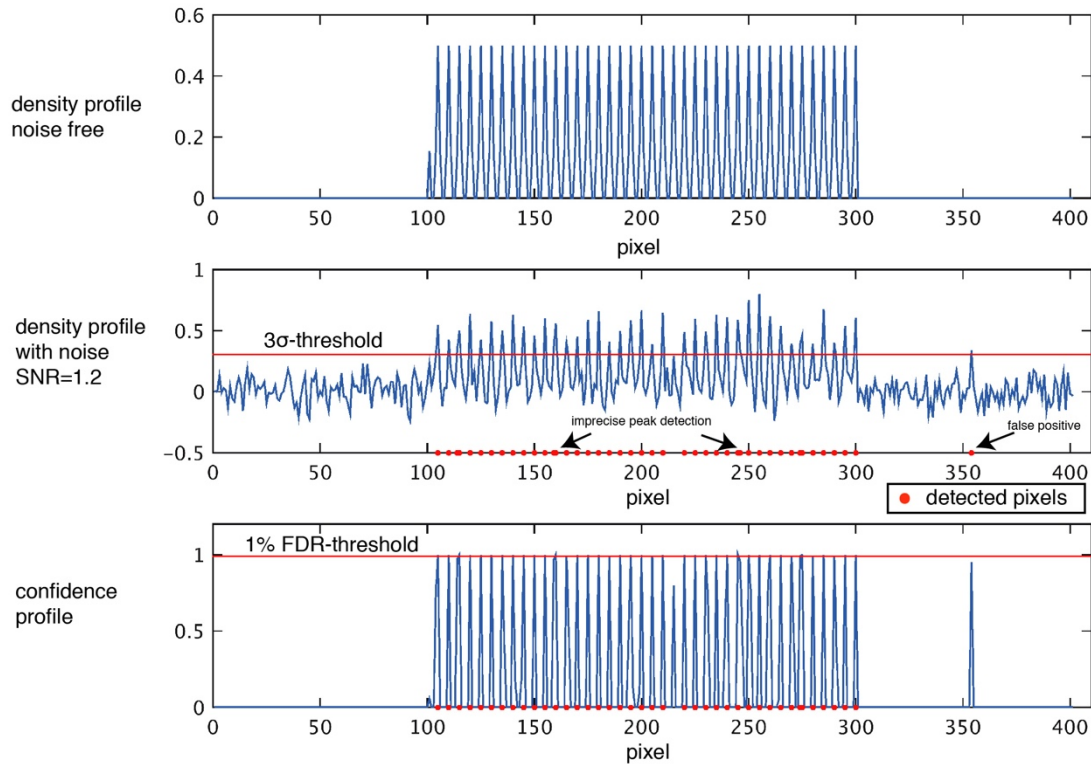

1099

1100 **Fig. S2. Effect of  $\sigma$  and FDR thresholding on 1D density profiles.**

1101 One-dimensional stacked plots of grid density with noise-free original (top), at signal-  
1102 to-noise ratio of 1.2 (center) and confidence map (bottom). The noisy density grid is  
1103 thresholded at  $3\sigma$  and the confidence map is thresholded at 1 % FDR. Conventional  
1104  $3\sigma$ -thresholding yields higher rates of false positives and some imprecise peak  
1105 positions (arrows).

Supplementary Figure 3

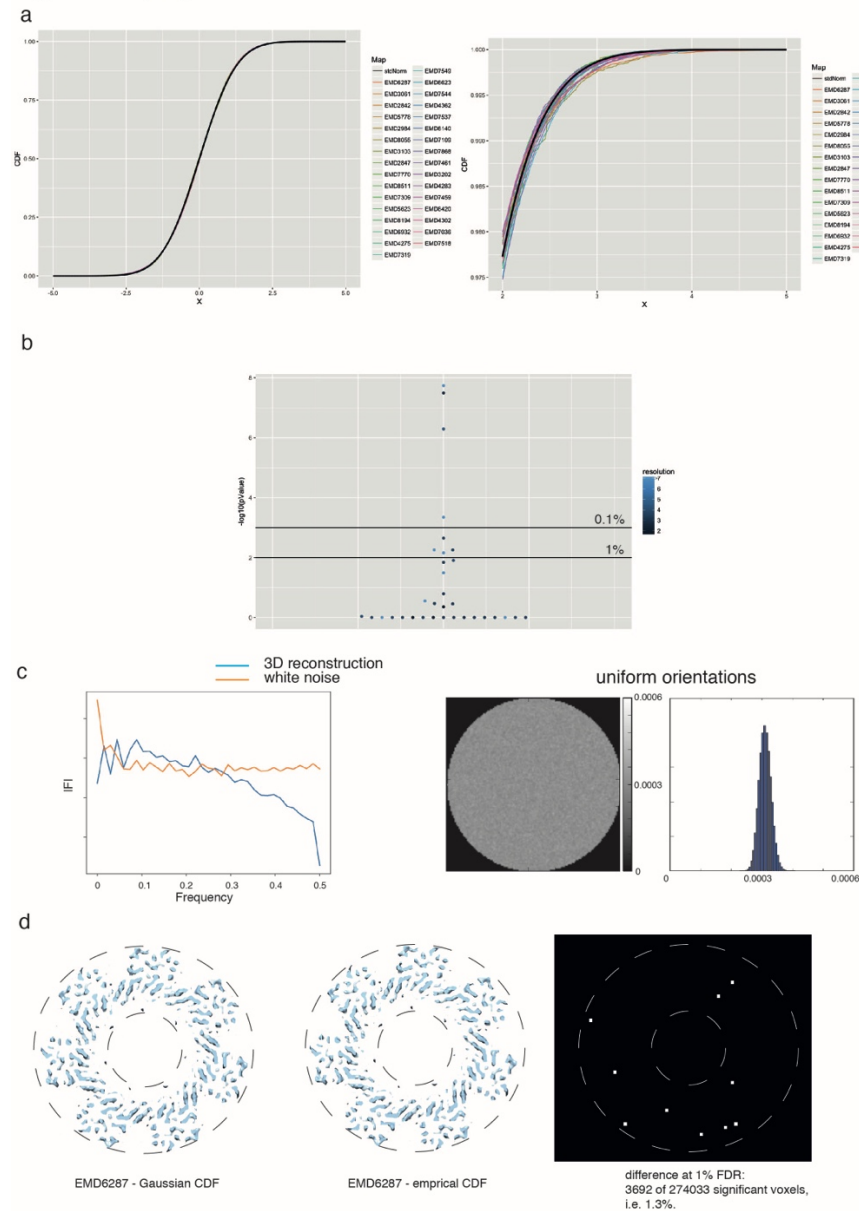

1106

1107

1108 **Fig. S3. Analysis of normality of cryo-EM densities.**

1109 (a) Left. Overlay of 32 cumulative density functions (CDF) derived from the above  
 1110 EMDB entries with ideal Gaussian CDF in black. Right. Zoomed inset to better  
 1111 highlight small differences. (b) 32 map entries are assessed with respect to normality  
 1112 according to the Anderson-Darling test, significance thresholds are displayed 1.0 and  
 1113 0.1 % respectively. (c) Left. Rotational power spectrum of a 3D reconstruction of white  
 1114 noise images in comparison with pure white noise spectrum. Right. Slice through 3D  
 1115 volume of variances estimated from 900 independent reconstructions from Gaussian  
 1116 white noise images with similar uniform orientations together with a histogram of the

1117 estimated variances, showing that background noise can be assumed uniform over  
1118 the central sphere in the reconstructed volume. (d) Cross-sectional view of confidence  
1119 maps generated of EMD6287 using Gaussian and empirical CDF. Difference map  
1120 between 1 % FDR binarized confidence maps in the respective image slice.

Supplementary Figure 4

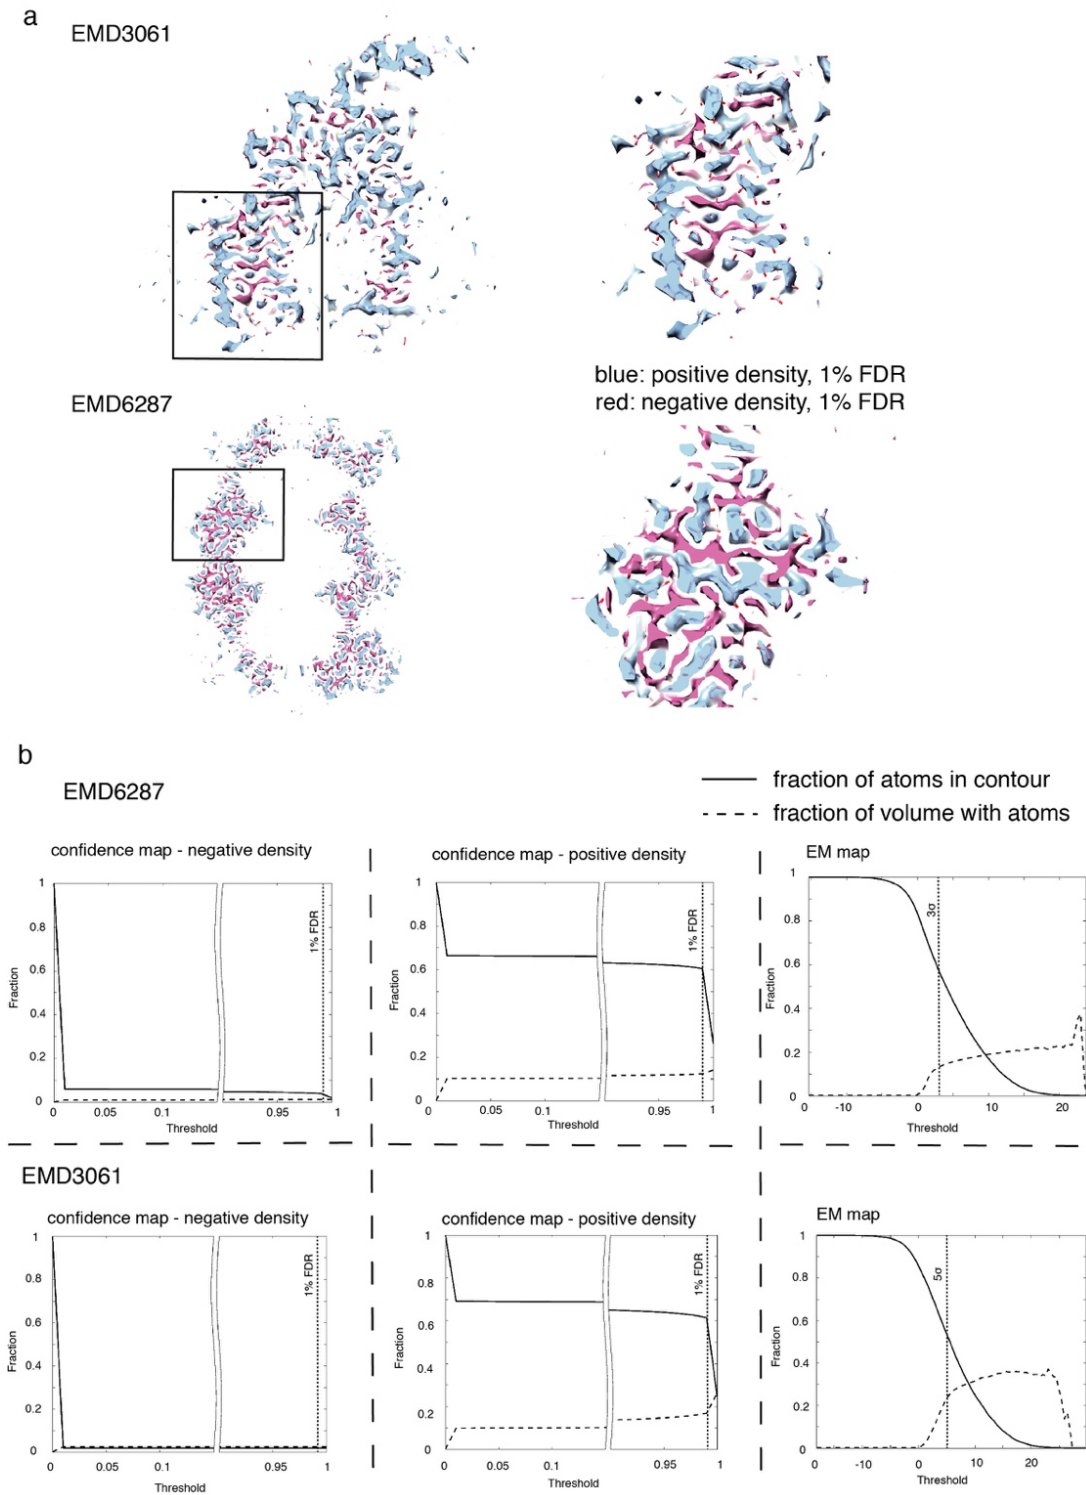

1121



1122 **Fig. S4. Analysis of positive and negative densities using confidence maps.**

1123 (a) Overlay of 1% FDR positive (blue) and negative (red) confidence maps from  
1124 original and inverted densities of EMD3061 (top) and EMD6287 (bottom) respectively.

1125 (b) Comparison of detected signal with corresponding atomic models by determining  
1126 the fraction of overlap of atoms with volume and fraction of volume with atoms as a  
1127 function of threshold for negative (left), positive (center) confidence maps and cryo-  
1128 EM maps (right), respectively.

Supplementary Figure 5

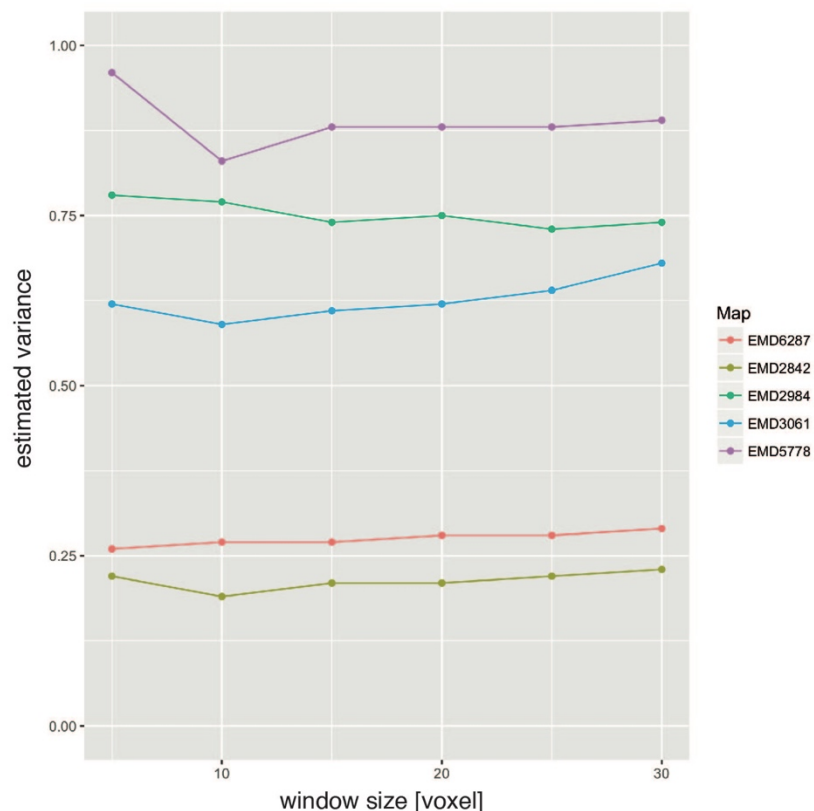

1129

1130 **Fig. S5. Effect of window size on estimated variance.**

1131 Estimated variance is stable with increasing window size from 5 to 30 voxels for a  
1132 series of EMD entries.

1133

## Supplementary Figure 6

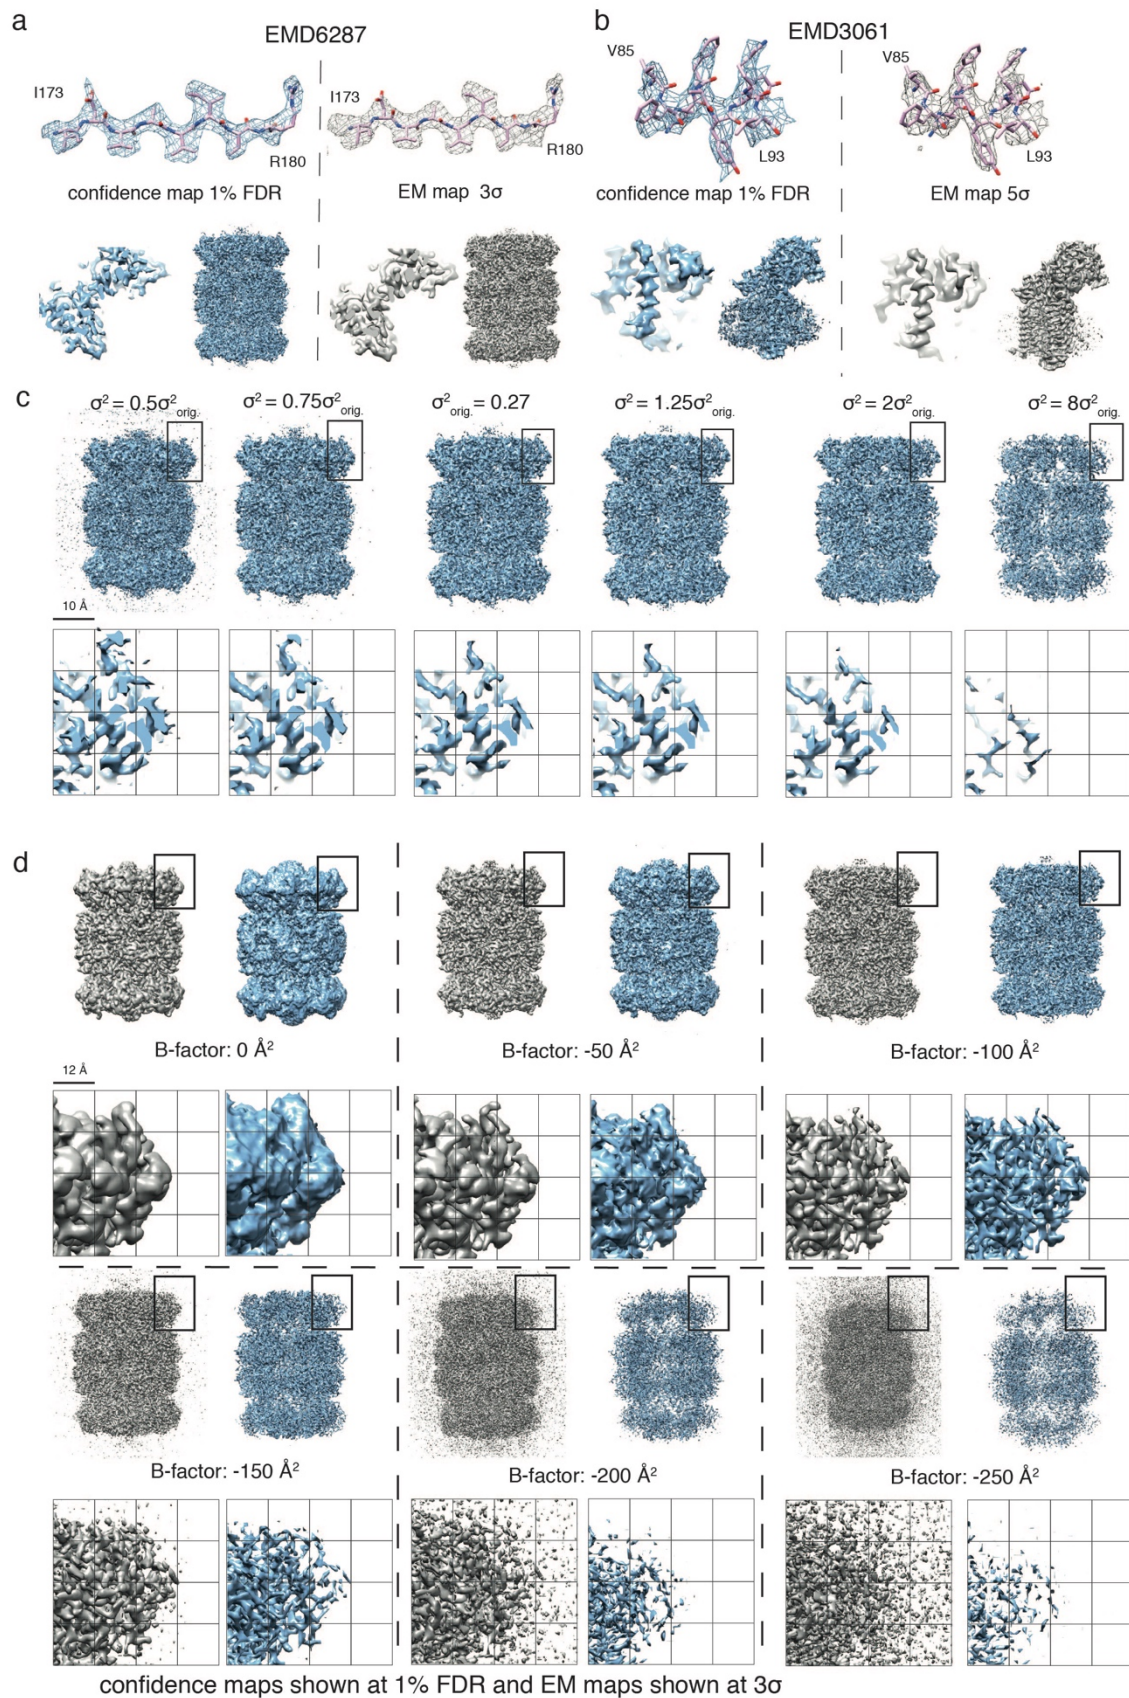

1134

1135 **Fig. S6. Confidence maps and effect of incorrect noise estimation.**

1136 (a) 20S proteasome map (EMD 6287) comparison of 1% FDR density (left) and  $3\sigma$ -  
1137 thresholded map (right). Shown are molecular details from I173 – R180 (top), slice  
1138 view (bottom left) and side view (bottom right) of density. (b)  $\gamma$ -secretase map (EMD  
1139 3061) comparison of 1% FDR confidence map and  $5\sigma$ -thresholded map. (c) Six  
1140 confidence maps of 20S proteasome (EMD-8267) including magnified inset based on  
1141 incorrect variance estimation: 1<sup>st</sup> and 2<sup>nd</sup> left noise is underestimated by 0.5 and 0.75  
1142 times the variance ( $\sigma^2$ ). In comparison with the correctly estimated noise (3<sup>rd</sup>), they  
1143 show excessive noise features declared as signal at 1 % FDR. When noise is  
1144 overestimated, which is more likely for cryo-EM maps, confidence maps are quite  
1145 insensitive to changes in map appearance. For multiples like  $1.25\sigma^2$  and  $2\sigma^2$  no  
1146 apparent density changes become visible (4<sup>th</sup> and 5<sup>th</sup>) unless strong overestimation  
1147 like  $8\sigma^2$  (6<sup>th</sup>) leads to disappearance of map features at a 1 % FDR threshold. (d) When  
1148 applying a series of B-factors to the 3D reconstruction of the 20S proteasome map,  
1149 we see that with higher B-factors, sharpened EM densities become dominated by  
1150 noise whereas corresponding confidence maps displayed at 1 % FDR show  
1151 disappearance of significant features thereby avoids over-interpreting noise features.

1152

1153

1154

1155

1156

1157

1158

1159

1160

Supplementary Figure 7

a

EMD8724

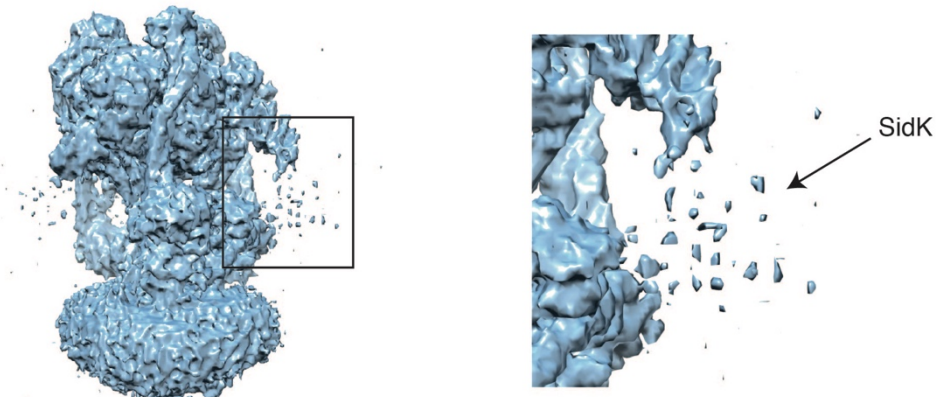

b

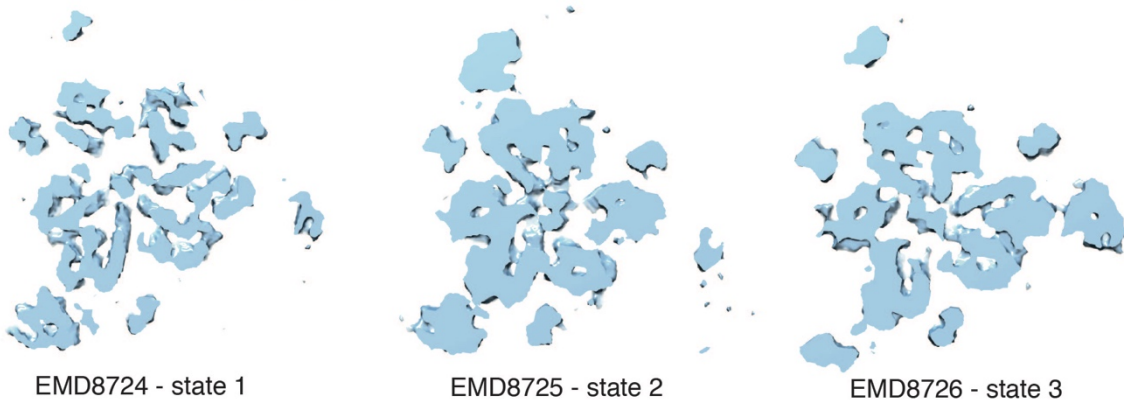

1161

1162 **Fig. S7. Confidence maps of compositionally and conformationally**  
1163 **heterogeneous complexes.**

1164 (a) Confidence map of yeast V-ATPase with Legionella pneumophila effector SidK  
1165 (EMD8724) at 1% FDR (left) together with a zoom on the flexible domains of SidK  
1166 (right). The confidence map shows significant density for the flexible domains,  
1167 however, not as continuous density. (b) Slices through confidence maps of 3D  
1168 classified cryo-EM maps. Different rotational states can be resolved in the confidence  
1169 maps.

1170

1171



Supplementary Figure 8

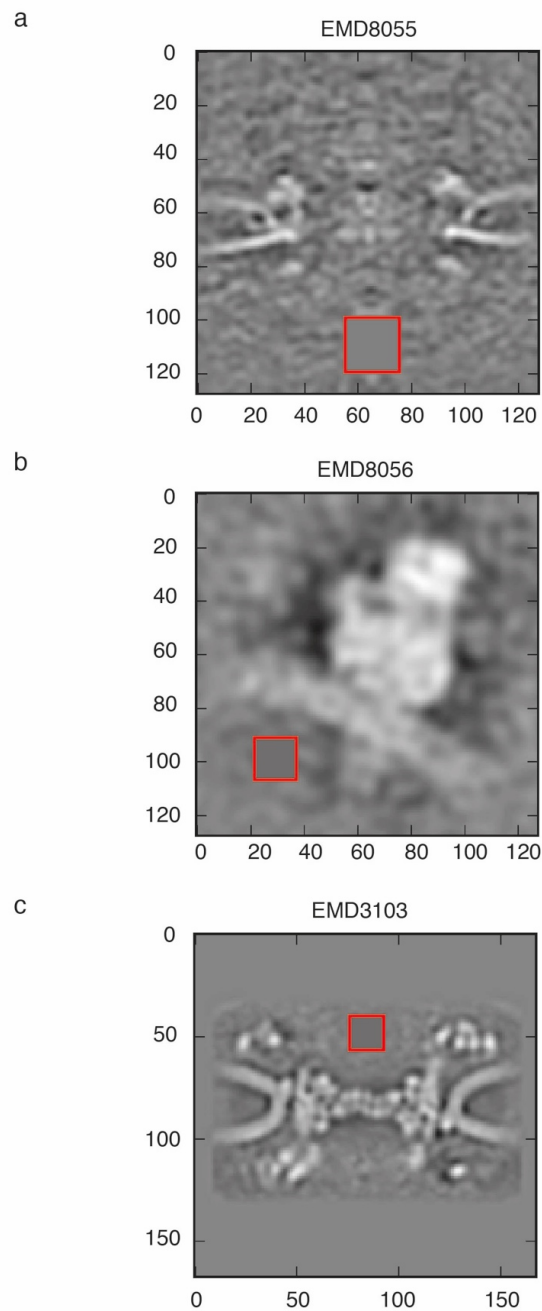

1172

1173 **Fig. S8. Noise estimation in subtomogram averages.**

1174 Gray-scale density slices with red windows for the voxel region used for variance  
1175 estimation: (a) EMD 8055: nuclear pore from HeLa cells by FIB-SEM, (b) EMD 8056:  
1176 ER-associated ribosomes, (c) EMD3103: 23 Å resolution nuclear pore subtomogram  
1177 average.

1178

## Supplementary Figure 9

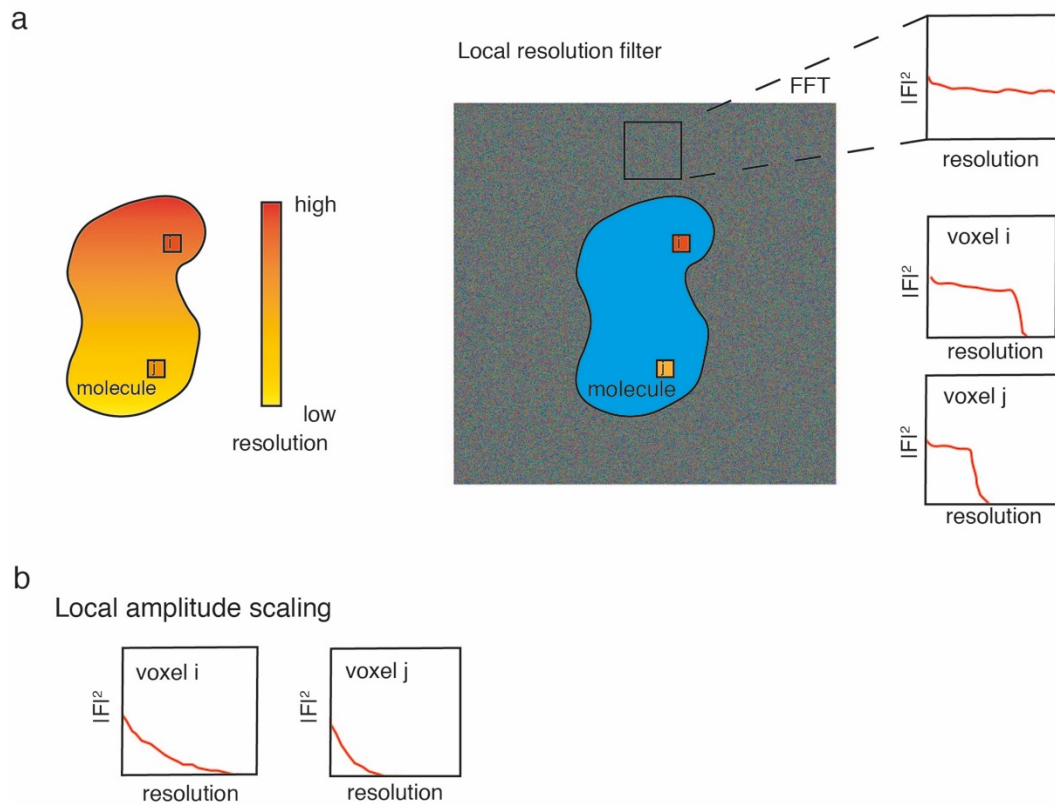

1179

1180 **Fig. S9. Variance adjustment based on local resolution and local amplitude**  
1181 **profile.**

1182 (a) Adjusting the local signal-to-noise ratio based on local resolution measurements:  
1183 for each voxel, the background windows are filtered according to the local resolution  
1184 at the respective voxels in order to estimate the noise levels of each voxel in the locally  
1185 filtered map. (b) In analogy, local sharpening is applied to background noise in order  
1186 to estimate resulting local noise distributions.

1187

Supplementary Figure 10

EMD2984

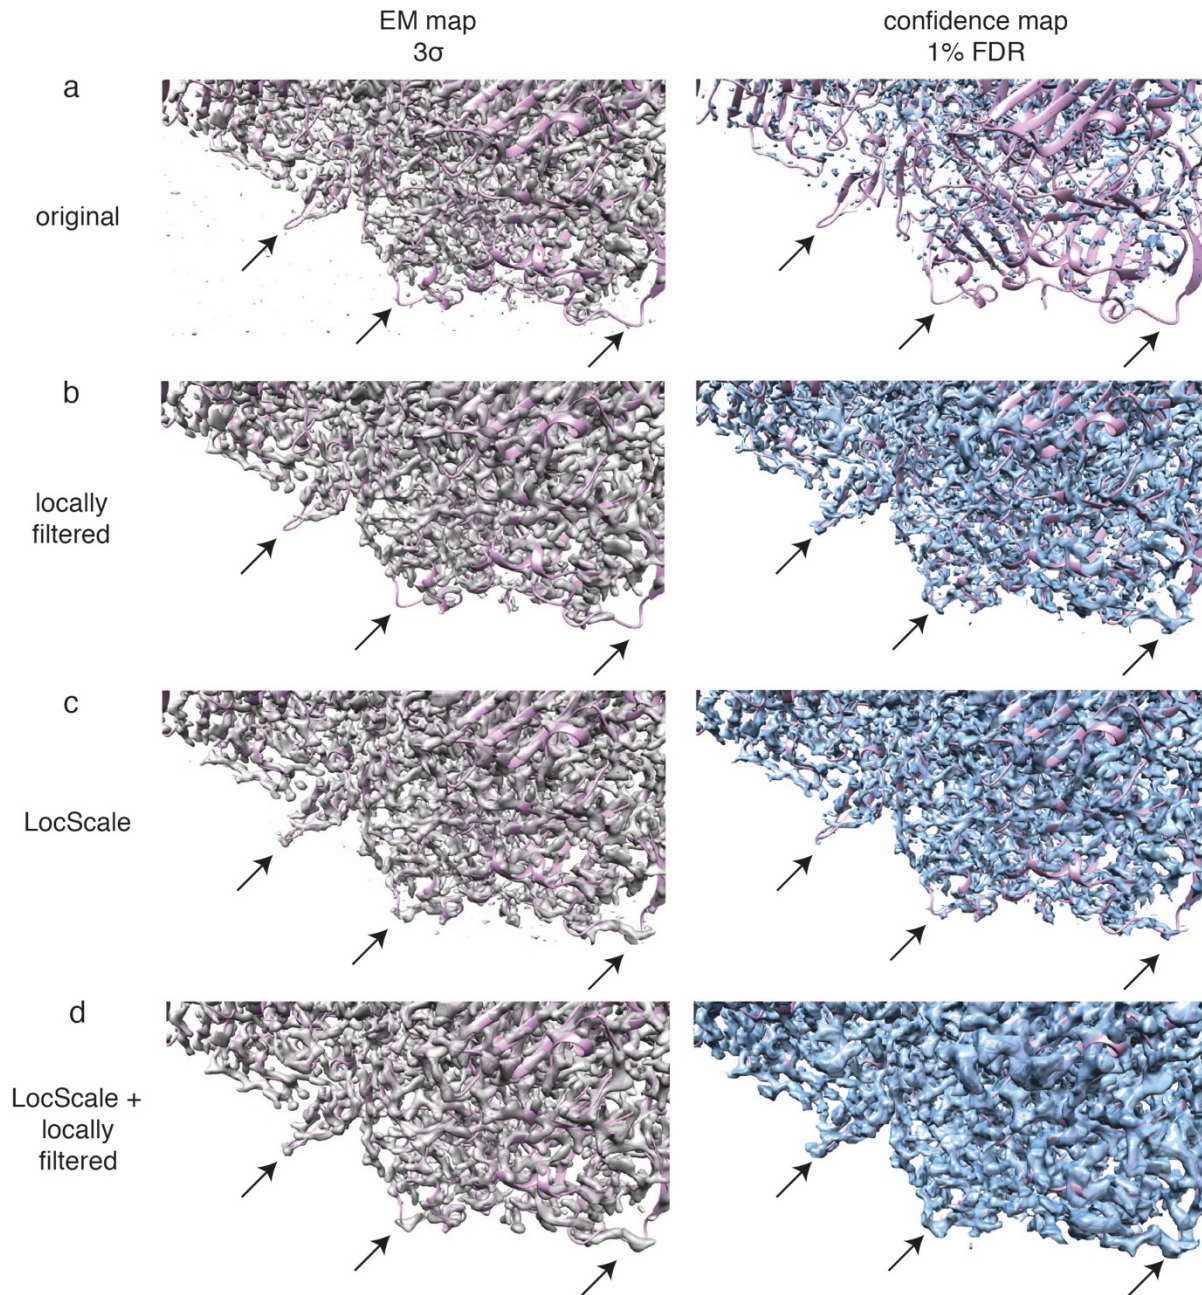

1188

1189

1190 **Fig. S10. Effect of local variance adjustments on confidence maps**

1191  $\beta$ -galactosidase (EMD 2984) cryo-EM map at  $3.0\sigma$  threshold (left, gray) and 1 % FDR

1192 confidence map based on different post-processing methods (right, blue). Global

1193 sharpening with uniform filtering, local filtering based on local resolution

1194 measurements, local sharpening and the combination of local sharpening with local

1195 filtering were compared. Confidence maps were generated with local noise estimate



1196 based on local resolution measurement, locally scaled window from a model reference  
1197 structure and the combination of both, which in this case shows the best preservation  
1198 of molecular density with respect to confidence.  
1199
